# Supplementary material for: Formation and loss of light absorbance by phenolic aqueous SOA by ● OH and an organic triplet excited state
Source: Copernicus journal article supplement (doi:10.5194/acp-24-4473-2024), 2024-04-17
Supplement: Supplementary file 1 [file acp-24-4473-2024-supplement.pdf]

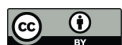

*Supplement of*

## **Formation and loss of light absorbance by phenolic aqueous SOA by ·OH and an organic triplet excited state**

**Stephanie Arciva et al.**

*Correspondence to:* Cort Anastasio ([canastasio@ucdavis.edu](mailto:canastasio@ucdavis.edu))

The copyright of individual parts of the supplement might differ from the article licence.

## Table of Contents

|                                                                                                                                                                                                     |    |
|-----------------------------------------------------------------------------------------------------------------------------------------------------------------------------------------------------|----|
| Table S1. Sampling time for ArOH oxidation reactions.....                                                                                                                                           | 3  |
| Table S2. Molar absorptivities for six highly substituted ArOH.....                                                                                                                                 | 4  |
| Table S3. ArOH decay kinetics by $\bullet\text{OH}$ and direct photodegradation.....                                                                                                                | 11 |
| Table S4. ArOH decay kinetics by $^3\text{C}^*$ and direct photodegradation.....                                                                                                                    | 12 |
| Table S5. aqSOA Mass Yields for highly substituted ArOH.....                                                                                                                                        | 13 |
| Table S6. $\text{MAC}_{\text{ArOH}}$ and $\text{MAC}_{\text{aqSOA,t1}}$ for ArOH with $\bullet\text{OH}$ and $^3\text{C}^*$ .....                                                                   | 14 |
| Table S7. Fraction of rate of sunlight absorption ( $R_{\text{abs}}$ ), $\text{AAE}_{300-400\text{nm}}$ and $\log_{10}(\text{MAC}_{405})$ for ArOH with $\bullet\text{OH}$ and $^3\text{C}^*$ ..... | 15 |
| Table S8. Experimental and normalized $k'_{\text{Rabs}}$ .....                                                                                                                                      | 17 |
| Table S9. $\bullet\text{OH}$ concentrations in experimental solutions and ambient conditions.....                                                                                                   | 18 |
| Table S10. $^3\text{C}^*$ concentrations in experimental solutions and ambient conditions.....                                                                                                      | 19 |
| Figure S1. Experimental and simulated actinic flux.....                                                                                                                                             | 20 |
| Figure S2. ArOH oxidation kinetics with $\bullet\text{OH}$ and $^3\text{C}^*$ .....                                                                                                                 | 21 |
| Figure S3. Direct photodegradation of SA, FA, and SyrAcid.....                                                                                                                                      | 22 |
| Figure S4. Molar absorptivities for six highly substituted ArOH.....                                                                                                                                | 23 |
| Figure S5. Absorbance measurements for mixtures during $\bullet\text{OH}$ reactions.....                                                                                                            | 24 |
| Figure S6. Absorbance measurements for mixtures during $^3\text{C}^*$ reactions.....                                                                                                                | 25 |
| Figure S7. MAC for VAL, FA, and SyrAcid.....                                                                                                                                                        | 26 |
| Figure S8. Rates of sunlight absorption for VAL, FA, and SyrAcid.....                                                                                                                               | 27 |
| Figure S9. aqSOA light absorption decay kinetics for TYR, GA, and SA.....                                                                                                                           | 28 |
| Figure S10. aqSOA light absorption decay kinetics for VAL, FA, and SyrAcid.....                                                                                                                     | 29 |
| Figure S11. Lifetime of phenolic BrC for $\bullet\text{OH}$ and $^3\text{C}^*$ reactions in clouds/drops and ALW.....                                                                               | 30 |
| Section S1. Potential Contributions of $\bullet\text{OH}$ and $^1\text{O}_2^*$ in $^3\text{C}^*$ Experiments.....                                                                                   | 31 |
| Section S2. Absorbance correction and $\text{MAC}_{\text{ArOH}}$ determination.....                                                                                                                 | 33 |

**Table S1.** Sampling time for ArOH oxidation reactions. Reaction times indicate approximately one, two, and three half-lives (i.e.,  $t_{1/2}$ ,  $2t_{1/2}$ , and  $3t_{1/2}$ ) unless noted otherwise. ArOH concentrations were 100  $\mu\text{M}$  except as marked. For  $\bullet\text{OH}$  reactions, the  $\text{H}_2\text{O}_2$  concentration was 5 mM, except for FA, SyrAcid and SA, which had 10 mM  $\text{H}_2\text{O}_2$ . For  $^3\text{C}^*$  reactions, solutions contained 10  $\mu\text{M}$  DMB, except for tyrosol, which had 5  $\mu\text{M}$  DMB.

| Reaction Condition                          | $\bullet\text{OH}$ Reaction (min) | $^3\text{C}^*$ Reaction (min) |
|---------------------------------------------|-----------------------------------|-------------------------------|
| Tyrosol (TYR)                               | 110                               | 150                           |
| $t_{1/2}$                                   | 155                               | 300                           |
|                                             | 235                               | 450                           |
| $2 t_{1/2}$                                 | 295                               | 600 ( $0.85t_{1/2}$ )         |
|                                             | 365                               | 750                           |
| $3 t_{1/2}$                                 | 415                               | 1424 ( $2t_{1/2}$ )           |
| Guaiacylacetone (GA)                        | 70                                | 90                            |
| $t_{1/2}$                                   | 140                               | 200                           |
|                                             | 215                               | 300                           |
| $2 t_{1/2}$                                 | 285                               | 400                           |
|                                             | 330                               | 520                           |
| $3 t_{1/2}$                                 | 385                               | 640                           |
| Vanillyl alcohol (VAL)                      | 60                                | 90                            |
| $t_{1/2}$                                   | 143                               | 130                           |
|                                             | 193                               | 250                           |
| $2 t_{1/2}$                                 | 258                               | 432                           |
|                                             | 323                               | 610                           |
| $3 t_{1/2}$                                 | 378                               | 1184 ( $3.4t_{1/2}$ )         |
| Ferulic acid (FA) (50 $\mu\text{M}$ )       | 60                                | 120                           |
| $t_{1/2}$                                   | 140                               | 240 ( $0.43t_{1/2}$ )         |
|                                             | 210                               | 440                           |
| $2 t_{1/2}$                                 | 280                               | 680 ( $1.6t_{1/2}$ )          |
|                                             | 350                               | -                             |
| $3 t_{1/2}$                                 | 420                               | 1170 ( $3.8t_{1/2}$ )         |
| Syringic acid (SyrAcid) (50 $\mu\text{M}$ ) | 20                                | 24                            |
| $t_{1/2}$                                   | 45                                | 48                            |
|                                             | 70                                | 72                            |
| $2 t_{1/2}$                                 | 85                                | 96                            |
|                                             | 100                               | 119                           |
| $3 t_{1/2}$                                 | 120                               | 131                           |
| Syringylacetone (SA) (50 $\mu\text{M}$ )    | 20                                | 27                            |
| $t_{1/2}$                                   | 40                                | 54                            |
|                                             | 60                                | 81                            |
| $2 t_{1/2}$                                 | 76                                | 108 ( $2.2t_{1/2}$ )          |
|                                             | 88                                | 135                           |
| $3 t_{1/2}$                                 | 98                                | 157 ( $3.5t_{1/2}$ )          |

**Table S2.** Molar absorptivities for highly substituted ArOH. Base-10 molar absorption coefficients ( $\epsilon$ ) for aqueous ArOH determined from five different solutions of ArOH (25  $\mu$ M, 100  $\mu$ M, 500  $\mu$ M, 1.0 mM, and 2.0 mM) in a 1 cm cell. Plots are shown in Figure S4.

| Wave-length (nm) | TYR   | GA    | VAL   | <i>trans</i> -FA <sup>a</sup> |      | <i>cis</i> -FA <sup>a</sup> |       | SyrAcid <sup>b</sup> |       | SA    |
|------------------|-------|-------|-------|-------------------------------|------|-----------------------------|-------|----------------------|-------|-------|
|                  |       |       |       | pH 5                          | pH 2 | pH 5                        | pH 2  | pH 5                 | pH 2  |       |
| 200              | 12500 | 36200 | 43900 | 11500                         | 8460 | 18400                       | 15900 | 24000                | 15500 | 44200 |
| 201              | 9690  | 35400 | 43200 | 11600                         | 8350 | 18300                       | 15700 | 24300                | 15900 | 45200 |
| 202              | 7890  | 33400 | 40000 | 11700                         | 8170 | 18300                       | 15000 | 24900                | 16700 | 46600 |
| 203              | 7030  | 30700 | 37300 | 11800                         | 7990 | 18400                       | 14300 | 25500                | 17400 | 47300 |
| 204              | 6240  | 27700 | 33600 | 12000                         | 7840 | 18500                       | 13700 | 26300                | 18200 | 47500 |
| 205              | 5790  | 24200 | 29300 | 12200                         | 7730 | 18800                       | 13000 | 27000                | 19100 | 46700 |
| 206              | 5540  | 21100 | 24600 | 12500                         | 7650 | 18900                       | 12400 | 27700                | 19900 | 45100 |
| 207              | 5490  | 18400 | 20400 | 12800                         | 7640 | 18900                       | 11800 | 28200                | 20700 | 42700 |
| 208              | 5490  | 16000 | 16500 | 13200                         | 7680 | 18900                       | 11200 | 28700                | 21500 | 39800 |
| 209              | 5560  | 14100 | 13300 | 13600                         | 7820 | 18900                       | 10800 | 29100                | 22200 | 36500 |
| 210              | 5640  | 12600 | 10700 | 14100                         | 8020 | 18900                       | 10500 | 29300                | 22900 | 33300 |
| 211              | 5750  | 11300 | 8960  | 14500                         | 8260 | 18800                       | 10200 | 29400                | 23600 | 30300 |
| 212              | 5910  | 10400 | 7710  | 14900                         | 8500 | 18600                       | 10000 | 29500                | 24200 | 27500 |
| 213              | 6010  | 9630  | 6940  | 15200                         | 8750 | 18500                       | 9890  | 29600                | 24800 | 25100 |
| 214              | 6090  | 9050  | 6450  | 15500                         | 9000 | 18300                       | 9720  | 29400                | 25200 | 22900 |
| 215              | 6200  | 8580  | 6170  | 15700                         | 9220 | 18000                       | 9570  | 29200                | 25600 | 21000 |
| 216              | 6290  | 8180  | 6010  | 15900                         | 9390 | 17600                       | 9430  | 28700                | 25900 | 19400 |
| 217              | 6470  | 7860  | 5950  | 15900                         | 9520 | 17200                       | 9270  | 27900                | 26100 | 18000 |
| 218              | 6630  | 7590  | 5960  | 15800                         | 9590 | 16700                       | 9090  | 26900                | 26000 | 16900 |
| 219              | 6830  | 7350  | 6010  | 15700                         | 9550 | 16200                       | 8920  | 25600                | 25700 | 15900 |
| 220              | 6970  | 7160  | 6070  | 15300                         | 9400 | 15600                       | 8740  | 23500                | 25100 | 15000 |
| 221              | 7030  | 6970  | 6150  | 14900                         | 9130 | 15000                       | 8550  | 21800                | 24200 | 14300 |
| 222              | 7000  | 6800  | 6240  | 14500                         | 8800 | 14400                       | 8340  | 20100                | 23000 | 13600 |
| 223              | 6800  | 6640  | 6340  | 14100                         | 8490 | 13800                       | 8130  | 18000                | 21500 | 13000 |
| 224              | 6510  | 6480  | 6430  | 13800                         | 8280 | 13200                       | 7960  | 15600                | 19600 | 12500 |
| 225              | 6050  | 6330  | 6520  | 13700                         | 8150 | 12600                       | 7830  | 14100                | 17500 | 12100 |
| 226              | 5470  | 6180  | 6590  | 13600                         | 8100 | 12100                       | 7720  | 11800                | 15300 | 11700 |
| 227              | 4820  | 6030  | 6630  | 13600                         | 8150 | 11600                       | 7630  | 10200                | 13100 | 11300 |
| 228              | 4160  | 5880  | 6620  | 13600                         | 8250 | 11100                       | 7550  | 8150                 | 11100 | 10900 |
| 229              | 3560  | 5710  | 6560  | 13500                         | 8370 | 10700                       | 7490  | 7080                 | 9370  | 10600 |
| 230              | 2910  | 5520  | 6430  | 13500                         | 8510 | 10300                       | 7410  | 6180                 | 7590  | 10200 |
| 231              | 2320  | 5290  | 6230  | 13400                         | 8650 | 9910                        | 7350  | 5450                 | 6240  | 9870  |
| 232              | 1790  | 5040  | 5980  | 13200                         | 8750 | 9520                        | 7280  | 4880                 | 5130  | 9530  |

| wave length (nm) | TYR  | GA   | VAL  | <i>trans</i> -FA |      | <i>cis</i> -FA |      | SyrAcid |       | SA   |
|------------------|------|------|------|------------------|------|----------------|------|---------|-------|------|
|                  |      |      |      | pH 5             | pH 2 | pH 5           | pH 2 | pH 5    | pH 2  |      |
| 233              | 1390 | 4760 | 5670 | 13000            | 8830 | 9160           | 7190 | 4450    | 4230  | 9160 |
| 234              | 1070 | 4480 | 5300 | 12800            | 8860 | 8830           | 7090 | 4130    | 3460  | 8770 |
| 235              | 800  | 4170 | 4890 | 12600            | 8860 | 8510           | 6980 | 3900    | 2920  | 8350 |
| 236              | 605  | 3850 | 4450 | 12300            | 8830 | 8210           | 6860 | 3740    | 2510  | 7920 |
| 237              | 450  | 3520 | 3920 | 12000            | 8780 | 7920           | 6730 | 3650    | 2200  | 7480 |
| 238              | 344  | 3200 | 3450 | 11700            | 8710 | 7640           | 6590 | 3610    | 2000  | 7010 |
| 239              | 266  | 2890 | 3000 | 11400            | 8640 | 7410           | 6450 | 3630    | 1880  | 6520 |
| 240              | 208  | 2580 | 2550 | 11000            | 8550 | 7210           | 6300 | 3700    | 1820  | 6050 |
| 241              | 171  | 2300 | 2140 | 10600            | 8440 | 7050           | 6140 | 3820    | 1820  | 5590 |
| 242              | 146  | 2050 | 1750 | 10200            | 8300 | 6930           | 5980 | 3970    | 1870  | 5110 |
| 243              | 132  | 1810 | 1430 | 9730             | 8120 | 6830           | 5800 | 4170    | 1960  | 4650 |
| 244              | 125  | 1620 | 1140 | 9270             | 7900 | 6780           | 5630 | 4380    | 2080  | 4230 |
| 245              | 124  | 1450 | 925  | 8700             | 7640 | 6780           | 5440 | 4630    | 2240  | 3830 |
| 246              | 129  | 1310 | 752  | 8240             | 7360 | 6800           | 5240 | 4900    | 2410  | 3470 |
| 247              | 137  | 1190 | 619  | 7780             | 7040 | 6840           | 5060 | 5180    | 2610  | 3150 |
| 248              | 149  | 1090 | 517  | 7330             | 6690 | 6930           | 4870 | 5480    | 2840  | 2840 |
| 249              | 163  | 1010 | 445  | 6910             | 6320 | 7040           | 4700 | 5790    | 3080  | 2570 |
| 250              | 182  | 947  | 399  | 6510             | 5950 | 7160           | 4530 | 6090    | 3330  | 2350 |
| 251              | 203  | 895  | 372  | 6160             | 5560 | 7320           | 4350 | 6410    | 3610  | 2150 |
| 252              | 226  | 855  | 361  | 5860             | 5070 | 7490           | 4280 | 6710    | 3950  | 1980 |
| 253              | 258  | 827  | 363  | 5610             | 4690 | 7680           | 4100 | 7030    | 4270  | 1840 |
| 254              | 289  | 810  | 377  | 5410             | 4320 | 7890           | 3950 | 7330    | 4600  | 1720 |
| 255              | 327  | 804  | 402  | 5280             | 3990 | 8120           | 3840 | 7630    | 4950  | 1630 |
| 256              | 367  | 810  | 437  | 5210             | 3690 | 8370           | 3740 | 7900    | 5320  | 1550 |
| 257              | 416  | 827  | 480  | 5210             | 3460 | 8610           | 3670 | 8140    | 5700  | 1480 |
| 258              | 468  | 856  | 533  | 5270             | 3270 | 8860           | 3630 | 8370    | 6090  | 1440 |
| 259              | 524  | 897  | 596  | 5400             | 3130 | 9090           | 3610 | 8550    | 6480  | 1420 |
| 260              | 583  | 949  | 667  | 5590             | 3060 | 9290           | 3620 | 8710    | 6870  | 1410 |
| 261              | 645  | 1010 | 747  | 5820             | 3040 | 9480           | 3640 | 8830    | 7250  | 1410 |
| 262              | 711  | 1080 | 835  | 6100             | 3060 | 9650           | 3680 | 8900    | 7750  | 1430 |
| 263              | 785  | 1170 | 933  | 6440             | 3120 | 9810           | 3760 | 8920    | 8120  | 1450 |
| 264              | 862  | 1270 | 1040 | 6810             | 3230 | 9930           | 3850 | 8910    | 8480  | 1480 |
| 265              | 944  | 1370 | 1150 | 7210             | 3370 | 10000          | 3920 | 8850    | 8810  | 1520 |
| 266              | 1030 | 1480 | 1260 | 7630             | 3540 | 10100          | 4020 | 8760    | 9090  | 1560 |
| 267              | 1100 | 1590 | 1400 | 8060             | 3730 | 10200          | 4140 | 8630    | 9350  | 1610 |
| 268              | 1180 | 1710 | 1520 | 8490             | 3960 | 10200          | 4260 | 8470    | 9590  | 1640 |
| 269              | 1240 | 1830 | 1650 | 8850             | 4190 | 10100          | 4390 | 8280    | 9790  | 1680 |
| 270              | 1300 | 1950 | 1770 | 9270             | 4440 | 10100          | 4490 | 8080    | 9960  | 1710 |
| 271              | 1360 | 2080 | 1890 | 9720             | 4710 | 9940           | 4590 | 7860    | 10000 | 1740 |
| 272              | 1420 | 2200 | 2020 | 10200            | 4990 | 9790           | 4670 | 7620    | 10100 | 1770 |

| wave length (nm) | TYR  | GA   | VAL  | <i>trans</i> -FA |       | <i>cis</i> -FA |      | SyrAcid |       | SA   |
|------------------|------|------|------|------------------|-------|----------------|------|---------|-------|------|
|                  |      |      |      | pH 5             | pH 2  | pH 5           | pH 2 | pH 5    | pH 2  |      |
| 273              | 1480 | 2320 | 2140 | 10600            | 5420  | 9580           | 4770 | 7360    | 10200 | 1780 |
| 274              | 1530 | 2440 | 2260 | 11100            | 5730  | 9350           | 4890 | 7100    | 10200 | 1790 |
| 275              | 1570 | 2550 | 2370 | 11500            | 6050  | 9100           | 5020 | 6840    | 10200 | 1800 |
| 276              | 1570 | 2660 | 2460 | 11900            | 6380  | 8850           | 5140 | 6570    | 10200 | 1800 |
| 277              | 1540 | 2750 | 2520 | 12300            | 6730  | 8610           | 5240 | 6310    | 10100 | 1810 |
| 278              | 1480 | 2820 | 2570 | 12700            | 7080  | 8370           | 5310 | 6050    | 10000 | 1810 |
| 279              | 1420 | 2860 | 2590 | 13100            | 7430  | 8140           | 5380 | 5810    | 9960  | 1820 |
| 280              | 1360 | 2880 | 2570 | 13400            | 7780  | 7940           | 5450 | 5560    | 9800  | 1820 |
| 281              | 1330 | 2870 | 2520 | 13700            | 8110  | 7750           | 5550 | 5320    | 9620  | 1810 |
| 282              | 1290 | 2830 | 2440 | 14000            | 8430  | 7580           | 5660 | 5080    | 9430  | 1790 |
| 283              | 1210 | 2780 | 2360 | 14200            | 8740  | 7430           | 5780 | 4840    | 9220  | 1750 |
| 284              | 1080 | 2710 | 2290 | 14400            | 9030  | 7310           | 5870 | 4610    | 9010  | 1700 |
| 285              | 897  | 2640 | 2180 | 14600            | 9300  | 7210           | 5930 | 4370    | 8790  | 1630 |
| 286              | 708  | 2540 | 2000 | 14700            | 9550  | 7130           | 5970 | 4130    | 8560  | 1570 |
| 287              | 526  | 2410 | 1750 | 14800            | 9780  | 7070           | 6020 | 3900    | 8340  | 1520 |
| 288              | 376  | 2240 | 1450 | 14900            | 9990  | 7020           | 6090 | 3670    | 8110  | 1480 |
| 289              | 255  | 2030 | 1100 | 14900            | 10200 | 7000           | 6170 | 3400    | 7870  | 1460 |
| 290              | 170  | 1800 | 836  | 14900            | 10500 | 6990           | 6260 | 3180    | 7550  | 1440 |
| 291              | 112  | 1580 | 607  | 14900            | 10700 | 6990           | 6300 | 2960    | 7300  | 1430 |
| 292              | 71   | 1370 | 424  | 14800            | 10800 | 7000           | 6330 | 2740    | 7040  | 1420 |
| 293              | 45.3 | 1200 | 289  | 14700            | 11000 | 7020           | 6380 | 2520    | 6770  | 1420 |
| 294              | 28   | 1050 | 192  | 14700            | 11100 | 7040           | 6440 | 2310    | 6490  | 1410 |
| 295              | 17.7 | 924  | 125  | 14600            | 11200 | 7040           | 6490 | 2100    | 6190  | 1400 |
| 296              | 11   | 828  | 81.5 | 14500            | 11200 | 7050           | 6540 | 1900    | 5890  | 1400 |
| 297              | 6.7  | 748  | 52.5 | 14500            | 11300 | 7040           | 6570 | 1700    | 5570  | 1400 |
| 298              | 4.0  | 682  | 34.1 | 14500            | 11300 | 7020           | 6640 | 1500    | 5230  | 1400 |
| 299              | 2.5  | 628  | 22.1 | 14500            | 11400 | 6980           | 6690 | 1320    | 4900  | 1390 |
| 300              | 1.5  | 582  | 14.4 | 14600            | 11400 | 6920           | 6730 | 1210    | 4560  | 1380 |
| 301              | 0.93 | 542  | 9.3  | 14700            | 11500 | 6840           | 6770 | 1050    | 4200  | 1370 |
| 302              | 0.56 | 508  | 6.1  | 14800            | 11500 | 6750           | 6810 | 909     | 3800  | 1360 |
| 303              | 0.35 | 478  | 3.9  | 14900            | 11600 | 6650           | 6860 | 787     | 3450  | 1350 |
| 304              | 0.23 | 452  | 2.6  | 15000            | 11700 | 6530           | 6880 | 677     | 3120  | 1330 |
| 305              | 0.14 | 428  | 1.7  | 15100            | 11800 | 6370           | 6900 | 581     | 2800  | 1320 |
| 306              | 0    | 407  | 1.3  | 15200            | 11900 | 6210           | 6910 | 498     | 2480  | 1310 |
| 307              |      | 387  | 0.98 | 15400            | 12100 | 6030           | 6920 | 426     | 2180  | 1300 |
| 308              |      | 369  | 0.75 | 15500            | 12200 | 5850           | 6940 | 364     | 1910  | 1280 |
| 309              |      | 353  | 0.57 | 15600            | 12300 | 5670           | 6960 | 311     | 1660  | 1260 |
| 310              |      | 338  | 0.43 | 15700            | 12500 | 5470           | 6980 | 264     | 1430  | 1240 |
| 311              |      | 323  | 0.33 | 15800            | 12700 | 5260           | 6990 | 222     | 1220  | 1220 |
| 312              |      | 310  | 0.25 | 15800            | 12900 | 5040           | 6970 | 189     | 1030  | 1200 |

| wave length (nm) | TYR | GA   | VAL  | <i>trans</i> -FA |       | <i>cis</i> -FA |      | SyrAcid |      | SA   |
|------------------|-----|------|------|------------------|-------|----------------|------|---------|------|------|
|                  |     |      |      | pH 5             | pH 2  | pH 5           | pH 2 | pH 5    | pH 2 |      |
| 313              |     | 297  | 0.19 | 15800            | 13100 | 4800           | 6920 | 156     | 889  | 1170 |
| 314              |     | 284  | 0.15 | 15800            | 13300 | 4550           | 6880 | 127     | 739  | 1140 |
| 315              |     | 273  | 0.11 | 15700            | 13500 | 4310           | 6840 | 104     | 610  | 1110 |
| 316              |     | 263  | 0    | 15700            | 13600 | 4080           | 6790 | 81.8    | 496  | 1080 |
| 317              |     | 252  |      | 15500            | 13800 | 3850           | 6760 | 66.1    | 401  | 1060 |
| 318              |     | 242  |      | 15400            | 13900 | 3620           | 6700 | 52.8    | 323  | 1020 |
| 319              |     | 232  |      | 15100            | 14000 | 3440           | 6610 | 41.7    | 257  | 994  |
| 320              |     | 222  |      | 14900            | 14100 | 3270           | 6530 | 33.3    | 204  | 962  |
| 321              |     | 213  |      | 14600            | 14200 | 3110           | 6480 | 26.6    | 161  | 928  |
| 322              |     | 204  |      | 14300            | 14200 | 2970           | 6410 | 21.2    | 126  | 892  |
| 323              |     | 195  |      | 13800            | 14200 | 2850           | 6300 | 16.8    | 97.9 | 856  |
| 324              |     | 186  |      | 13400            | 14100 | 2740           | 6180 | 14.1    | 76.5 | 824  |
| 325              |     | 178  |      | 13000            | 14100 | 2640           | 6080 | 11.7    | 60.0 | 792  |
| 326              |     | 169  |      | 12500            | 13900 | 2570           | 5970 | 9.8     | 46.5 | 756  |
| 327              |     | 161  |      | 12000            | 13800 | 2500           | 5830 | 8.2     | 35.9 | 710  |
| 328              |     | 152  |      | 11500            | 13600 | 2430           | 5720 | 6.8     | 27.5 | 674  |
| 329              |     | 144  |      | 10900            | 13400 | 2370           | 5570 | 5.7     | 21.2 | 642  |
| 330              |     | 136  |      | 10400            | 13200 | 2290           | 5400 | 4.6     | 16.5 | 598  |
| 331              |     | 127  |      | 9770             | 12900 | 2220           | 5240 | 3.8     | 12.6 | 558  |
| 332              |     | 119  |      | 9180             | 12500 | 2150           | 5070 | 3.0     | 9.7  | 524  |
| 333              |     | 111  |      | 8610             | 12200 | 2100           | 4920 | 2.6     | 7.5  | 494  |
| 334              |     | 103  |      | 8050             | 11800 | 2070           | 4740 | 2.4     | 5.8  | 458  |
| 335              |     | 96   |      | 7500             | 11400 | 2030           | 4570 | 1.9     | 4.4  | 422  |
| 336              |     | 89.3 |      | 6950             | 11000 | 2000           | 4370 | 1.7     | 3.6  | 390  |
| 337              |     | 82.8 |      | 6410             | 10500 | 1940           | 4150 | 1.4     | 3.1  | 362  |
| 338              |     | 76.7 |      | 5910             | 9940  | 1890           | 3920 | 0.99    | 2.6  | 336  |
| 339              |     | 70.9 |      | 5440             | 9460  | 1810           | 3730 | 0.81    | 2.0  | 306  |
| 340              |     | 65.5 |      | 5000             | 8970  | 1730           | 3470 | 0.68    | 1.7  | 284  |
| 341              |     | 60.8 |      | 4610             | 8490  | 1640           | 3320 | 0.64    | 1.6  | 260  |
| 342              |     | 56.6 |      | 4240             | 8010  | 1570           | 3160 | 0.62    | 1.4  | 240  |
| 343              |     | 53.1 |      | 3890             | 7560  | 1490           | 3000 | 0.75    | 1.3  | 218  |
| 344              |     | 49.5 |      | 3560             | 7120  | 1420           | 2830 | 0.61    | 0    | 204  |
| 345              |     | 46.4 |      | 3270             | 6680  | 1340           | 2670 | 0.29    |      | 188  |
| 346              |     | 43.5 |      | 3000             | 6260  | 1260           | 2520 | 0.27    |      | 168  |
| 347              |     | 40.8 |      | 2740             | 5830  | 1190           | 2390 | 0.17    |      | 158  |
| 348              |     | 38.5 |      | 2510             | 5420  | 1150           | 2260 | 0       |      | 152  |
| 349              |     | 36.4 |      | 2290             | 4920  | 1100           | 2120 |         |      | 148  |
| 350              |     | 34.5 |      | 2090             | 4550  | 1050           | 1990 |         |      | 144  |
| 351              |     | 32.6 |      | 1890             | 4180  | 974            | 1860 |         |      | 138  |
| 352              |     | 30.8 |      | 1710             | 3810  | 898            | 1720 |         |      | 126  |
| 353              |     | 29.3 |      | 1530             | 3480  | 828            | 1590 |         |      | 118  |

| wave length (nm) | TYR | GA   | VAL | <i>trans</i> -FA |      | <i>cis</i> -FA |      | SyrAcid |      | SA  |
|------------------|-----|------|-----|------------------|------|----------------|------|---------|------|-----|
|                  |     |      |     | pH 5             | pH 2 | pH 5           | pH 2 | pH 5    | pH 2 |     |
| 354              |     | 28.0 |     | 1380             | 3150 | 760            | 1470 |         |      | 122 |
| 355              |     | 26.5 |     | 1230             | 2850 | 692            | 1360 |         |      | 116 |
| 356              |     | 24.9 |     | 1100             | 2570 | 627            | 1250 |         |      | 108 |
| 357              |     | 23.6 |     | 977              | 2300 | 568            | 1150 |         |      | 106 |
| 358              |     | 22.4 |     | 870              | 2060 | 515            | 1050 |         |      | 96  |
| 359              |     | 21.4 |     | 771              | 1830 | 467            | 960  |         |      | 86  |
| 360              |     | 20.2 |     | 682              | 1630 | 424            | 873  |         |      | 88  |
| 361              |     | 19.2 |     | 602              | 1450 | 381            | 789  |         |      | 84  |
| 362              |     | 18.8 |     | 533              | 1290 | 342            | 719  |         |      | 72  |
| 363              |     | 18.1 |     | 471              | 1150 | 306            | 657  |         |      | 68  |
| 364              |     | 17.1 |     | 417              | 1010 | 275            | 601  |         |      | 74  |
| 365              |     | 16.4 |     | 366              | 896  | 246            | 545  |         |      | 70  |
| 366              |     | 15.8 |     | 322              | 788  | 221            | 489  |         |      | 68  |
| 367              |     | 15.0 |     | 281              | 690  | 196            | 437  |         |      | 72  |
| 368              |     | 14.2 |     | 244              | 601  | 173            | 388  |         |      | 72  |
| 369              |     | 13.4 |     | 212              | 523  | 153            | 350  |         |      | 70  |
| 370              |     | 12.7 |     | 184              | 454  | 135            | 316  |         |      | 66  |
| 371              |     | 12.4 |     | 159              | 393  | 118            | 281  |         |      | 62  |
| 372              |     | 11.9 |     | 137              | 337  | 103            | 248  |         |      | 60  |
| 373              |     | 11.3 |     | 118              | 290  | 90.7           | 218  |         |      | 60  |
| 374              |     | 10.6 |     | 101              | 250  | 79.6           | 193  |         |      | 56  |
| 375              |     | 10.1 |     | 86.6             | 213  | 69.2           | 171  |         |      | 52  |
| 376              |     | 9.6  |     | 73.8             | 181  | 60.3           | 153  |         |      | 54  |
| 377              |     | 9.1  |     | 63.1             | 154  | 52.3           | 135  |         |      | 54  |
| 378              |     | 8.7  |     | 54.2             | 131  | 45.3           | 119  |         |      | 44  |
| 379              |     | 8.5  |     | 46.8             | 113  | 39.7           | 105  |         |      | 44  |
| 380              |     | 8.2  |     | 40.3             | 97   | 34.7           | 92   |         |      | 46  |
| 381              |     | 7.7  |     | 34.4             | 83   | 30.1           | 80   |         |      | 46  |
| 382              |     | 7.3  |     | 29.5             | 71   | 26.3           | 69   |         |      | 38  |
| 383              |     | 7.0  |     | 25.6             | 60   | 22.5           | 62   |         |      | 34  |
| 384              |     | 6.7  |     | 22               | 51   | 19.1           | 55   |         |      | 40  |
| 385              |     | 6.5  |     | 19               | 43   | 16.7           | 51   |         |      | 40  |
| 386              |     | 6.3  |     | 16.2             | 37   | 14.8           | 44   |         |      | 38  |
| 387              |     | 5.9  |     | 13.4             | 31   | 12.3           | 37   |         |      | 34  |
| 388              |     | 5.7  |     | 11               | 26   | 10.6           | 33   |         |      | 26  |
| 389              |     | 5.4  |     | 9.3              | 22   | 8.4            | 28   |         |      | 30  |
| 390              |     | 5.1  |     | 8.0              | 18   | 6.7            | 22   |         |      | 28  |
| 391              |     | 5.0  |     | 0                | 0    | 0              | 0    |         |      | 22  |
| 392              |     | 4.9  |     |                  |      |                |      |         |      | 20  |
| 393              |     | 4.6  |     |                  |      |                |      |         |      | 18  |
| 394              |     | 4.2  |     |                  |      |                |      |         |      | 20  |



| wave length (nm) | TYR | GA   | VAL | <i>trans</i> -FA |      | <i>cis</i> -FA |      | SyrAcid |      | SA |
|------------------|-----|------|-----|------------------|------|----------------|------|---------|------|----|
|                  |     |      |     | pH 5             | pH 2 | pH 5           | pH 2 | pH 5    | pH 2 |    |
| 395              |     | 3.9  |     |                  |      |                |      |         |      | 18 |
| 396              |     | 3.9  |     |                  |      |                |      |         |      | 16 |
| 397              |     | 3.8  |     |                  |      |                |      |         |      | 12 |
| 398              |     | 3.6  |     |                  |      |                |      |         |      | 12 |
| 399              |     | 3.3  |     |                  |      |                |      |         |      | 14 |
| 400              |     | 3.1  |     |                  |      |                |      |         |      | 12 |
| 401              |     | 3.1  |     |                  |      |                |      |         |      | 0  |
| 402              |     | 3.0  |     |                  |      |                |      |         |      |    |
| 403              |     | 2.9  |     |                  |      |                |      |         |      |    |
| 404              |     | 2.8  |     |                  |      |                |      |         |      |    |
| 405              |     | 2.7  |     |                  |      |                |      |         |      |    |
| 406              |     | 2.6  |     |                  |      |                |      |         |      |    |
| 407              |     | 2.5  |     |                  |      |                |      |         |      |    |
| 408              |     | 2.4  |     |                  |      |                |      |         |      |    |
| 409              |     | 2.2  |     |                  |      |                |      |         |      |    |
| 410              |     | 2.0  |     |                  |      |                |      |         |      |    |
| 411              |     | 2.0  |     |                  |      |                |      |         |      |    |
| 412              |     | 2.0  |     |                  |      |                |      |         |      |    |
| 413              |     | 1.8  |     |                  |      |                |      |         |      |    |
| 414              |     | 1.7  |     |                  |      |                |      |         |      |    |
| 415              |     | 1.7  |     |                  |      |                |      |         |      |    |
| 416              |     | 1.7  |     |                  |      |                |      |         |      |    |
| 417              |     | 1.7  |     |                  |      |                |      |         |      |    |
| 418              |     | 1.6  |     |                  |      |                |      |         |      |    |
| 419              |     | 1.5  |     |                  |      |                |      |         |      |    |
| 420              |     | 1.5  |     |                  |      |                |      |         |      |    |
| 421              |     | 1.5  |     |                  |      |                |      |         |      |    |
| 422              |     | 1.4  |     |                  |      |                |      |         |      |    |
| 423              |     | 1.2  |     |                  |      |                |      |         |      |    |
| 424              |     | 1.2  |     |                  |      |                |      |         |      |    |
| 425              |     | 1.2  |     |                  |      |                |      |         |      |    |
| 426              |     | 1.2  |     |                  |      |                |      |         |      |    |
| 427              |     | 1.1  |     |                  |      |                |      |         |      |    |
| 428              |     | 1.1  |     |                  |      |                |      |         |      |    |
| 429              |     | 1.0  |     |                  |      |                |      |         |      |    |
| 430              |     | 1.0  |     |                  |      |                |      |         |      |    |
| 431              |     | 0.96 |     |                  |      |                |      |         |      |    |
| 432              |     | 0.80 |     |                  |      |                |      |         |      |    |
| 433              |     | 0.69 |     |                  |      |                |      |         |      |    |
| 434              |     | 0.67 |     |                  |      |                |      |         |      |    |
| 435              |     | 0.70 |     |                  |      |                |      |         |      |    |
| 436              |     | 0.69 |     |                  |      |                |      |         |      |    |

| wave length (nm) | TYR | GA   | VAL | <i>trans</i> -FA |      | <i>cis</i> -FA |      | SyrAcid |      | SA |
|------------------|-----|------|-----|------------------|------|----------------|------|---------|------|----|
|                  |     |      |     | pH 5             | pH 2 | pH 5           | pH 2 | pH 5    | pH 2 |    |
| 437              |     | 0.61 |     |                  |      |                |      |         |      |    |
| 438              |     | 0.60 |     |                  |      |                |      |         |      |    |
| 439              |     | 0.70 |     |                  |      |                |      |         |      |    |
| 440              |     | 0.75 |     |                  |      |                |      |         |      |    |
| 441              |     | 0.70 |     |                  |      |                |      |         |      |    |
| 442              |     | 0.52 |     |                  |      |                |      |         |      |    |
| 443              |     | 0.49 |     |                  |      |                |      |         |      |    |
| 444              |     | 0.53 |     |                  |      |                |      |         |      |    |
| 445              |     | 0.44 |     |                  |      |                |      |         |      |    |
| 446              |     | 0.37 |     |                  |      |                |      |         |      |    |
| 447              |     | 0.41 |     |                  |      |                |      |         |      |    |
| 448              |     | 0.36 |     |                  |      |                |      |         |      |    |
| 449              |     | 0.32 |     |                  |      |                |      |         |      |    |
| 450              |     | 0.26 |     |                  |      |                |      |         |      |    |
| 451              |     | 0.26 |     |                  |      |                |      |         |      |    |
| 452              |     | 0.28 |     |                  |      |                |      |         |      |    |
| 453              |     | 0.26 |     |                  |      |                |      |         |      |    |
| 454              |     | 0.26 |     |                  |      |                |      |         |      |    |
| 455              |     | 0.20 |     |                  |      |                |      |         |      |    |
| 456              |     | 0.06 |     |                  |      |                |      |         |      |    |
| 457              |     | 0.04 |     |                  |      |                |      |         |      |    |
| 458              |     | 0.10 |     |                  |      |                |      |         |      |    |
| 459              |     | 0.11 |     |                  |      |                |      |         |      |    |
| 460              |     | 0.08 |     |                  |      |                |      |         |      |    |
| 461              |     | 0.04 |     |                  |      |                |      |         |      |    |
| 462              |     | 0    |     |                  |      |                |      |         |      |    |

<sup>a</sup> Ferulic acid has a carboxylic acid group with a  $pK_a$  of 4.6 (Erdemgil et al., 2007). Molar absorption coefficients of *trans*- and *cis*-ferulic acid were determined by first measuring the *trans* isomer. As noted above, we prepared five different solutions of *trans*-ferulic acid, which is the isomer received from the vendor. We measured the absorbance of these initial solutions and determined the molar absorptivity directly for *trans*-FA. Next, we illuminated each of the five solutions individually for 20 mins to equilibrate the photoisomerization of FA. We quantified the fraction of each isomer using HPLC and measured the absorbance of the solution after illumination. Then, we determined the molar absorption coefficients of *cis*-FA by  $\epsilon_{cis-FA} = \frac{Abs_{corrected}}{l \times [cis-FA]}$ , where  $Abs_{corrected}$  is the absorbance of the solution corrected to remove the absorbance contribution from *trans*-FA,  $l$  is the cell path length (1 cm), and  $[cis-FA]$  is the concentration of the *cis*-isomer in M, as determined by HPLC.

<sup>b</sup> Syringic acid has a carboxylic group with a  $pK_a$  of 4.2 (Erdemgil et al., 2007).

**Table S3.** ArOH Decay Kinetics by  $\bullet\text{OH}^{\text{a}}$ 

| Phenol          | $k'_{\text{light}}^{\text{b}}$<br>( $10^{-4} \text{ s}^{-1}$ ) | $j_{\text{ArOH}}^{\text{c}}$<br>( $10^{-4} \text{ s}^{-1}$ ) | $k'_{\text{ArOH}}^{\text{d}}$<br>( $10^{-4} \text{ s}^{-1}$ ) | $[\bullet\text{OH}]_{\text{exp}}^{\text{e}}$<br>( $10^{-15} \text{ M}$ ) |
|-----------------|----------------------------------------------------------------|--------------------------------------------------------------|---------------------------------------------------------------|--------------------------------------------------------------------------|
| TYR             | 0.89                                                           | $\approx 0$                                                  | 1.3                                                           | 8.9                                                                      |
| GA              | 0.88                                                           | $\approx 0$                                                  | 1.2                                                           | 8.2                                                                      |
| VAL             | 0.96                                                           | $\approx 0$                                                  | 1.3                                                           | 8.4                                                                      |
| FA <sup>f</sup> | 0.91                                                           | 0.041                                                        | 1.2                                                           | 6.5                                                                      |
| SyrAcid         | 2.9                                                            | 0.45                                                         | 3.6                                                           | 18                                                                       |
| SA              | 3.4                                                            | 0.65                                                         | 4.1                                                           | 17                                                                       |

<sup>a</sup> Concentrations of reactants are in Table S1. The photolysis rate constant for 2-nitrobenzaldehyde, our chemical actinometer, was measured once during our  $\bullet\text{OH}$  experiments, with a value of  $5.0 \times 10^3 \text{ s}^{-1}$ .

<sup>b</sup> Experimentally determined pseudo-first-order rate constant for the decay of ArOH by  $\bullet\text{OH}$ , determined as the negative of the slope of  $\ln([\text{ArOH}]/[\text{ArOH}]_0)$  versus reaction time (Figure S2).

<sup>c</sup> Previously measured photolysis rate constants under midday, Davis winter-solstice sunlight for ArOH in simulated sunlight from Arciva et al. (2022).

<sup>d</sup> Corrected pseudo-first-order decay constant for ArOH loss by  $\bullet\text{OH}$ , determined by  $k'_{\text{ArOH}} = \left[ \left( \frac{k'_{\text{light}}}{j_{2\text{NB},\text{win}}} \right) \times j_{2\text{NB},\text{win}} \right] - j_{\text{ArOH}}$ . We normalized values to sunlight conditions at midday on the winter solstice at Davis ( $j_{2\text{NB},\text{win}} = 0.0070 \text{ s}^{-1}$ ) (Anastasio and McGregor, 2001).

<sup>e</sup> Steady-state concentrations of  $\bullet\text{OH}$  in experimental solutions (normalized to winter-solstice sunlight) estimated by  $[\bullet\text{OH}] = \frac{k'_{\text{ArOH}}}{k_{\text{ArOH}+\text{OH}}}$ , where  $k_{\text{ArOH}+\text{OH}}$  ( $\text{M}^{-1} \text{ s}^{-1}$ ) is the second-order rate constant of ArOH with  $\bullet\text{OH}$  (Arciva et al., 2022).

<sup>f</sup> Values for FA represent a weighted average between the *cis* and *trans* isomers.

**Table S4.** ArOH Decay Kinetics by  $^3\text{C}^*$ 

| Phenol          | $j_{2\text{NB}}^{\text{a}}$<br>( $10^{-4} \text{ s}^{-1}$ ) | $k'_{\text{light}}^{\text{b}}$<br>( $10^{-4} \text{ s}^{-1}$ ) | $k'_{\text{ArOH}}^{\text{c}}$<br>( $10^{-4} \text{ s}^{-1}$ ) | $[^3\text{C}^*]_{\text{exp}}^{\text{d}}$<br>( $10^{-14} \text{ M}$ ) |
|-----------------|-------------------------------------------------------------|----------------------------------------------------------------|---------------------------------------------------------------|----------------------------------------------------------------------|
| TYR             | 59                                                          | 0.16                                                           | 0.19                                                          | 4.0                                                                  |
| GA              | 65                                                          | 0.50                                                           | 0.54                                                          | 2.9                                                                  |
| VAL             | 100                                                         | 0.31                                                           | 0.21                                                          | 1.2                                                                  |
| FA <sup>e</sup> | 61                                                          | 0.37                                                           | 0.38                                                          | 4.6                                                                  |
| SyrAcid         | 61                                                          | 2.4                                                            | 2.4                                                           | 11                                                                   |
| SA              | 61                                                          | 2.6                                                            | 2.4                                                           | 8.7                                                                  |

<sup>a</sup> Photolysis rate constant for 2-nitrobenzaldehyde, a chemical actinometer, on the day of an aqSOA experiment.

<sup>b</sup> Pseudo-first-order rate constant for the decay of ArOH by oxidizing triplets, determined from the slope of the plot  $\ln([\text{ArOH}]/[\text{ArOH}]_0)$  versus reaction time (Figure S2).

<sup>c</sup> Corrected pseudo-first-order decay of ArOH by  $^3\text{C}^*$ , determined by  $k'_{\text{ArOH}} = \left[ \left( \frac{k'_{\text{light}}}{j_{2\text{NB}}} \right) \times j_{2\text{NB,win}} \right] - j_{\text{ArOH}}$ . Values of  $j_{\text{ArOH}}$ , the direct photodegradation rate constant for each phenol normalized to Davis winter-solstice sunlight, are in Table S2.  $k'_{\text{ArOH}}$  values are normalized to sunlight conditions at midday on the winter solstice at Davis ( $j_{2\text{NB,win}} = 0.0070 \text{ s}^{-1}$ ) (Anastasio and McGregor, 2001).

<sup>d</sup> Steady-state concentration of  $^3\text{C}^*$  in experimental solutions (normalized to winter-solstice sunlight) estimated by  $[^3\text{C}^*] = \frac{k'_{\text{ArOH}}}{k_{\text{ArOH}+^3\text{C}^*}}$ , where  $k_{\text{ArOH}+^3\text{C}^*}$  ( $\text{M}^{-1} \text{ s}^{-1}$ ) as the second-order rate constant of ArOH with  $^3\text{C}^*$  (Ma et al., 2021).

<sup>e</sup> Values for FA represent a weighted average between the *cis* and *trans* isomers.

**Table S5.** aqSOA Mass Yields for highly substituted ArOH

| Compound              | •OH Reaction<br>aqSOA Mass Yield ( $\pm 1\sigma$ ) <sup>a</sup> | <sup>3</sup> C* Reaction<br>aqSOA Mass Yield ( $\pm 1\sigma$ ) <sup>b</sup> |
|-----------------------|-----------------------------------------------------------------|-----------------------------------------------------------------------------|
| TYR                   | 94.3 ( $\pm 3.6$ )                                              | 85.9 ( $\pm 3.9$ )                                                          |
| GA                    | 65.5 ( $\pm 7.8$ )                                              | 84.5 ( $\pm 3.8$ )                                                          |
| VAL                   | 73.7 ( $\pm 3.1$ )                                              | 59.0 ( $\pm 2.0$ )                                                          |
| FA                    | 83.1 ( $\pm 6.1$ )                                              | 90.6 ( $\pm 13.8$ )                                                         |
| SyrAcid               | 63.8 ( $\pm 2.7$ )                                              | 78.5 ( $\pm 8.6$ )                                                          |
| SA                    | 81.4 ( $\pm 4.9$ )                                              | 99.1 ( $\pm 7.9$ )                                                          |
| Avg ( $\pm 1\sigma$ ) | 82 ( $\pm 12$ )                                                 | 83 ( $\pm 14$ )                                                             |

<sup>a</sup> AqSOA mass yields are an average of measurements of samples at one, two, and three half-lives (i.e.,  $t_{1/2}$ ,  $2t_{1/2}$ ,  $3t_{1/2}$ ) (Arciva et al., 2022).

<sup>b</sup> AqSOA mass yields are an average of measurements of samples at one, two, and three half-lives (i.e.,  $t_{1/2}$ ,  $2t_{1/2}$ ,  $3t_{1/2}$ ) (Ma et al., 2021).

**Table S6.**  $MAC_{ArOH}$  and  $MAC_{aqSOA,t1}$  for ArOH reacting with  $\bullet OH$  or  ${}^3C^*$ . MAC values (in units of  $m^2 g^{-1}$ ) at 300 nm for the parent ArOH ( $MAC_{ArOH}$ ) and for the aqSOA at the first sampled time point ( $MAC_{aqSOA,t1}$ ) with reaction time as marked. For aqSOA values, we subtracted the absorbance contribution from the reactants (i.e., unreacted ArOH and oxidant precursor).

|         |              | $\bullet OH$ Reaction | ${}^3C^*$ Reaction |
|---------|--------------|-----------------------|--------------------|
| Phenol  | $MAC_{ArOH}$ | $MAC_{aqSOA,t1}$      | $MAC_{aqSOA,t1}$   |
| TYR     | 0.00         | 0.63 (110 min)        | 1.7 (150 min)      |
| GA      | 0.88         | 3.0 (70 min)          | 3.3 (90 min)       |
| VAL     | 0.02         | 3.4 (60 min)          | 3.2 (90 min)       |
| FA      | 9.0          | 4.4 (60 min)          | 5.5 (120 min)      |
| SyrAcid | 1.5          | 6.1 (20 min)          | 9.0 (24 min)       |
| SA      | 1.7          | 5.1 (20 min)          | 6.0 (27 min)       |

**Table S7.** Light absorption characteristics of the aqSOA: Fraction of light absorption ( $R_{\text{abs}}$ ) due to short wavelengths,  $\text{AAE}_{300-400\text{nm}}$ , and  $\log_{10}(\text{MAC}_{405})$ . Values are listed as a time series from top to bottom (with times shown in Table S1).  $R_{\text{abs}}$  data are shown in Figures 4 and S8.

| Phenol  | •OH Reactions                                                         |                                              |                               | <sup>3</sup> C* Reactions                                             |                                              |                               |
|---------|-----------------------------------------------------------------------|----------------------------------------------|-------------------------------|-----------------------------------------------------------------------|----------------------------------------------|-------------------------------|
|         | Fraction of $R_{\text{abs,t}}$ from wavelengths < 400 nm <sup>a</sup> | $\text{AAE}_{300-400\text{nm}}$ <sup>b</sup> | $\log_{10}(\text{MAC}_{405})$ | Fraction of $R_{\text{abs,t}}$ from wavelengths < 400 nm <sup>a</sup> | $\text{AAE}_{300-400\text{nm}}$ <sup>b</sup> | $\log_{10}(\text{MAC}_{405})$ |
| TYR     | 0.23                                                                  | 8.8                                          | -1.36                         | 0.38                                                                  | 10.22                                        | -1.05                         |
|         | 0.32                                                                  | 8.8                                          | -1.25                         | 0.37                                                                  | 8.43                                         | -0.80                         |
|         | 0.40                                                                  | 8.7                                          | -1.18                         | 0.45                                                                  | 8.57                                         | -0.83                         |
|         | 0.47                                                                  | 8.6                                          | -1.17                         | 0.39                                                                  | 7.53                                         | -0.67                         |
|         | 0.48                                                                  | 8.6                                          | -1.15                         | 0.46                                                                  | 7.94                                         | -0.76                         |
|         | 0.52                                                                  | 8.6                                          | -1.16                         | 0.53                                                                  | 7.63                                         | -0.73                         |
| GA      | 0.48                                                                  | 9.1                                          | -0.72                         | 0.83                                                                  | 9.6                                          | -0.77                         |
|         | 0.54                                                                  | 9.0                                          | -0.79                         | 0.78                                                                  | 8.7                                          | -0.69                         |
|         | 0.54                                                                  | 8.9                                          | -0.84                         | 0.77                                                                  | 8.4                                          | -0.69                         |
|         | 0.57                                                                  | 9.2                                          | -0.93                         | 0.76                                                                  | 8.3                                          | -0.70                         |
|         | 0.59                                                                  | 9.3                                          | -0.98                         | 0.77                                                                  | 8.3                                          | -0.72                         |
|         | 0.59                                                                  | 9.3                                          | -1.04                         | 0.77                                                                  | 8.3                                          | -0.74                         |
| VAL     | 0.25                                                                  | 10.1                                         | -0.76                         | 0.16                                                                  | 7.5                                          | -0.46                         |
|         | 0.37                                                                  | 9.5                                          | -0.76                         | 0.21                                                                  | 7.5                                          | -0.46                         |
|         | 0.44                                                                  | 9.2                                          | -0.78                         | 0.31                                                                  | 7.2                                          | -0.42                         |
|         | 0.49                                                                  | 9.1                                          | -0.83                         | 0.37                                                                  | 6.8                                          | -0.36                         |
|         | 0.51                                                                  | 8.9                                          | -0.89                         | 0.41                                                                  | 6.8                                          | -0.35                         |
|         | 0.54                                                                  | 8.9                                          | -0.95                         | 0.44                                                                  | 6.8                                          | -0.36                         |
| FA      | 0.67                                                                  | 11                                           | -0.75                         | 0.74                                                                  | 12                                           | -0.83                         |
|         | 0.68                                                                  | 11                                           | -0.79                         | 0.68                                                                  | 11                                           | -0.72                         |
|         | 0.67                                                                  | 10                                           | -0.80                         | 0.71                                                                  | 11                                           | -0.78                         |
|         | 0.68                                                                  | 10                                           | -0.85                         | 0.76                                                                  | 11                                           | -0.84                         |
|         | 0.67                                                                  | 9.9                                          | -0.90                         | 0.71                                                                  | 10                                           | -0.78                         |
|         | 0.68                                                                  | 9.6                                          | -0.93                         |                                                                       |                                              |                               |
| SA      | 0.63                                                                  | 5.0                                          | 0.06                          | 0.64                                                                  | 3.7                                          | 0.28                          |
|         | 0.67                                                                  | 5.2                                          | -0.01                         | 0.65                                                                  | 3.9                                          | 0.26                          |
|         | 0.67                                                                  | 5.3                                          | -0.05                         | 0.65                                                                  | 3.9                                          | 0.24                          |
|         | 0.66                                                                  | 5.3                                          | -0.08                         | 0.64                                                                  | 4.0                                          | 0.21                          |
|         | 0.67                                                                  | 5.6                                          | -0.14                         | 0.64                                                                  | 4.1                                          | 0.18                          |
|         | 0.67                                                                  | 5.7                                          | -0.19                         | 0.64                                                                  | 4.1                                          | 0.16                          |
| SyrAcid | 0.70                                                                  | 15                                           | -1.19                         | 0.55                                                                  | 12                                           | -0.54                         |
|         | 0.48                                                                  | 14                                           | -1.02                         | 0.53                                                                  | 11                                           | -0.51                         |
|         | 0.45                                                                  | 14                                           | -1.07                         | 0.52                                                                  | 11                                           | -0.54                         |
|         | 0.44                                                                  | 14                                           | -1.10                         | 0.49                                                                  | 11                                           | -0.55                         |
|         | 0.41                                                                  | 13                                           | -1.17                         | 0.50                                                                  | 11                                           | -0.58                         |
|         | 0.43                                                                  | 13                                           | -1.31                         | 0.50                                                                  | 11                                           | -0.66                         |

<sup>a</sup> Fraction of the rate of sunlight absorption by aqSOA at the first illumination time point that is due to wavelengths below 400 nm.

<sup>b</sup> Absorption Ångström exponent calculated using  $AAE_{300-400nm} = -\frac{\ln\frac{MAC_{300}}{MAC_{400}}}{\ln\frac{300}{400}}$ .



**Table S8.** Experimental and normalized  $k'_{\text{Rabs}}$  values.

| Phenol  | •OH Reactions                                                       |                                                                 | <sup>3</sup> C* Reactions                                           |                                                                 |
|---------|---------------------------------------------------------------------|-----------------------------------------------------------------|---------------------------------------------------------------------|-----------------------------------------------------------------|
|         | $k'_{\text{Rabs,exp}}^{\text{a}}$<br>( $10^{-3} \text{ min}^{-1}$ ) | $k'_{\text{Rabs}}^{\text{b}}$<br>( $10^{-3} \text{ min}^{-1}$ ) | $k'_{\text{Rabs,exp}}^{\text{c}}$<br>( $10^{-3} \text{ min}^{-1}$ ) | $k'_{\text{Rabs}}^{\text{d}}$<br>( $10^{-3} \text{ min}^{-1}$ ) |
| TYR     | 0.74                                                                | 1.0                                                             | 0.080                                                               | 0.095                                                           |
| GA      | 2.6                                                                 | 3.6                                                             | 0.46                                                                | 0.50                                                            |
| VAL     | 3.1                                                                 | 4.3                                                             | 0.24                                                                | 0.17                                                            |
| FA      | 1.7                                                                 | 2.4                                                             | 0.0046                                                              | 0.0053                                                          |
| SyrAcid | 6.7                                                                 | 9.4                                                             | 3.4                                                                 | 3.9                                                             |
| SA      | 4.9                                                                 | 6.9                                                             | 2.4                                                                 | 2.8                                                             |

<sup>a</sup> Experimentally measured rate constant for loss of the rate of light absorption by •OH-derived aqSOA in the presence of •OH.

<sup>b</sup> Corrected pseudo-first-order decay constant for the loss of light absorption by aqSOA in the presence of •OH determined by  $k'_{\text{Rabs}} = \left[ \left( \frac{k'_{\text{Rabs,exp}}}{j_{2\text{NB}}} \right) \times j_{2\text{NB,win}} \right]$ . We normalized values to sunlight conditions at midday on the winter solstice at Davis ( $j_{2\text{NB,win}} = 0.0070 \text{ s}^{-1}$ ) (Anastasio and McGregor, 2001).

<sup>c</sup> Experimentally measured rate constant for loss of the rate of light absorption by <sup>3</sup>C\*-derived aqSOA in the presence of <sup>3</sup>C\*.

<sup>d</sup> Corrected pseudo-first-order decay constant for the loss of light absorption by aqSOA in the presence of <sup>3</sup>C\*, determined by  $k'_{\text{Rabs}} = \left[ \left( \frac{k'_{\text{Rabs,exp}}}{j_{2\text{NB}}} \right) \times j_{2\text{NB,win}} \right]$ . We normalized values to sunlight conditions at midday on the winter solstice at Davis ( $j_{2\text{NB,win}} = 0.0070 \text{ s}^{-1}$ ) (Anastasio and McGregor, 2001).

**Table S9.** •OH concentrations and rate constants for loss of absorbance under experimental solutions and extrapolated to ambient conditions in aerosol liquid water (ALW) and cloud/fog drops (drop).

| Phenol  | [•OH] <sub>exp</sub> <sup>a</sup><br>(10 <sup>-15</sup> M) | <i>k</i> ' <sub>Rabs</sub> <sup>b</sup><br>(10 <sup>-3</sup> min <sup>-1</sup> ) | [•OH] <sub>drop</sub> /<br>[•OH] <sub>exp</sub> <sup>c</sup><br>(M / M) | <i>k</i> ' <sub>Rabs,drop</sub> <sup>d</sup><br>(10 <sup>-3</sup> min <sup>-1</sup> ) | [•OH] <sub>ALW</sub> /<br>[•OH] <sub>exp</sub> <sup>e</sup><br>(M / M) | <i>k</i> ' <sub>Rabs,ALW</sub> <sup>f</sup><br>(10 <sup>-3</sup> min <sup>-1</sup> ) |
|---------|------------------------------------------------------------|----------------------------------------------------------------------------------|-------------------------------------------------------------------------|---------------------------------------------------------------------------------------|------------------------------------------------------------------------|--------------------------------------------------------------------------------------|
| TYR     | 8.9                                                        | 1.0                                                                              | 0.85                                                                    | 0.88                                                                                  | 0.77                                                                   | 0.79                                                                                 |
| GA      | 8.2                                                        | 3.6                                                                              | 0.92                                                                    | 3.4                                                                                   | 0.83                                                                   | 3.0                                                                                  |
| VAL     | 8.4                                                        | 4.3                                                                              | 0.91                                                                    | 4.0                                                                                   | 0.82                                                                   | 3.5                                                                                  |
| FA      | 6.5                                                        | 2.4                                                                              | 1.2                                                                     | 2.8                                                                                   | 1.0                                                                    | 2.5                                                                                  |
| SyrAcid | 18                                                         | 9.4                                                                              | 0.42                                                                    | 3.9                                                                                   | 0.38                                                                   | 3.5                                                                                  |
| SA      | 17                                                         | 6.9                                                                              | 0.46                                                                    | 3.2                                                                                   | 0.41                                                                   | 2.9                                                                                  |

<sup>a</sup> •OH concentration calculated from the pseudo-first-order loss of ArOH for each experiment (Table S3). Values are normalized to Davis winter-solstice conditions and corrected for  $j_{\text{ArOH}}$ .

<sup>b</sup> Experimentally determined rate constant for decay of the rate of light absorption by aqSOA determined by the plot of the natural log of the total rate of light absorption from 280 to 800 nm (Equation 1) versus reaction time.

<sup>c</sup> Ratio of [•OH] estimated in fog drops to the •OH concentration in our experiment. Both conditions are normalized to midday winter-solstice sunlight in Davis. For fog drops we use the Ma et al. (2024) estimate of [•OH]<sub>drop</sub> = 7.6 × 10<sup>-15</sup> M for the average of four particle types and a dilution condition typical of a fog drop (3 × 10<sup>-5</sup> μg-PM / μg-water).

<sup>d</sup> Estimated rate constant for loss of the rate of light absorption by aqSOA in a fog/cloud drop, determined as the measured (and sunlight-normalized) value of *k*'<sub>Rabs</sub> multiplied by the ratio [•OH]<sub>drop</sub> / [•OH]<sub>exp</sub>.

<sup>e</sup> Ratio of [•OH] estimated in aerosol liquid water to the •OH concentration in our experiment; both values are normalized to winter-solstice sunlight. We use an estimate of [•OH]<sub>ALW</sub> = 6.8 × 10<sup>-15</sup> M for 1 μg-PM / 1 μg-water for the average of four particle types, which were significantly influenced by residential wood combustion, from Ma et al. (2024).

<sup>f</sup> Estimated rate constant for loss of the rate of light absorption by aqSOA in ALW, determined as the measured (and sunlight-normalized) value of *k*'<sub>Rabs</sub> multiplied by the ratio [•OH]<sub>ALW</sub> / [•OH]<sub>exp</sub>.

**Table S10.**  $^3\text{C}^*$  concentrations and rate constants for loss of absorbance under experimental solutions and extrapolated to ambient conditions in aerosol liquid water (ALW) and cloud/fog drops (drop).

| Phenol  | $[\text{}^3\text{C}^*]_{\text{exp}}^{\text{a}}$<br>( $10^{-14}$ M) | $k'_{\text{Rabs}}^{\text{b}}$<br>( $10^{-3}$ min $^{-1}$ ) | $[\text{}^3\text{C}^*]_{\text{drop}} / [\text{}^3\text{C}^*]_{\text{exp}}^{\text{c}}$<br>(M / M) | $k'_{\text{Rabs,drop}}^{\text{d}}$<br>( $10^{-3}$ min $^{-1}$ ) | $[\text{}^3\text{C}^*]_{\text{ALW}} / [\text{}^3\text{C}^*]_{\text{exp}}^{\text{e}}$<br>(M / M) | $k'_{\text{Rabs,ALW}}^{\text{f}}$<br>( $10^{-3}$ min $^{-1}$ ) |
|---------|--------------------------------------------------------------------|------------------------------------------------------------|--------------------------------------------------------------------------------------------------|-----------------------------------------------------------------|-------------------------------------------------------------------------------------------------|----------------------------------------------------------------|
| TYR     | 4.0                                                                | 0.095                                                      | 0.89                                                                                             | 0.084                                                           | 14                                                                                              | 1.4                                                            |
| GA      | 2.9                                                                | 0.50                                                       | 1.3                                                                                              | 0.62                                                            | 20                                                                                              | 10                                                             |
| VAL     | 1.2                                                                | 0.17                                                       | 3.1                                                                                              | 0.51                                                            | 49                                                                                              | 8.3                                                            |
| FA      | 4.6                                                                | 0.0053                                                     | 0.77                                                                                             | 0.0041                                                          | 13                                                                                              | 0.066                                                          |
| SyrAcid | 11                                                                 | 3.9                                                        | 0.32                                                                                             | 1.2                                                             | 5.2                                                                                             | 20                                                             |
| SA      | 8.7                                                                | 2.8                                                        | 0.41                                                                                             | 1.1                                                             | 6.7                                                                                             | 18                                                             |

<sup>a</sup>  $^3\text{C}^*$  concentration calculated from the pseudo-first-order loss of ArOH for each experiment (Table S4). Values are normalized to Davis winter-solstice conditions and corrected for  $j_{\text{ArOH}}$ .

<sup>b</sup> Experimentally determined rate constant for decay of the rate of light absorption by aqSOA determined by the plot of the natural log of the total rate of light absorption from 280 to 800 nm (Equation 1) versus reaction time.

<sup>c</sup> Ratio of  $[\text{}^3\text{C}^*]$  estimated in fog drops to the  $\bullet\text{OH}$  concentration in our experiments. Both values are normalized to winter-solstice sunlight. For fog drops we use the Ma et al. (2024) estimate of  $[\text{}^3\text{C}^*]_{\text{drop}} = 3.6 \times 10^{-14}$  M for the average of four particle types and a dilution condition typical of fog drops ( $3 \times 10^{-5}$   $\mu\text{g-PM} / \mu\text{g-water}$ ).

<sup>d</sup> Estimated rate constant for loss of the rate of light absorption by aqSOA in a fog/cloud drop, determined as the measured (and sunlight-normalized) value of  $k'_{\text{Rabs}}$  multiplied by the ratio  $[\text{}^3\text{C}^*]_{\text{drop}} / [\text{}^3\text{C}^*]_{\text{exp}}$ .

<sup>e</sup> Ratio of  $[\text{}^3\text{C}^*]$  estimated in aerosol liquid water to the  $^3\text{C}^*$  concentration in our experiment; both values are normalized to winter-solstice sunlight. We use an estimate of  $[\text{}^3\text{C}^*]_{\text{ALW}} = 5.8 \times 10^{-13}$  M for 1  $\mu\text{g-PM} / 1 \mu\text{g-water}$  for the average of four particle types, which were significantly influenced by residential wood combustion, from Ma et al. (2024).

<sup>f</sup> Estimated rate constant for loss of the rate of light absorption by aqSOA in ALW, determined as the measured (and sunlight-normalized) value of  $k'_{\text{Rabs}}$  multiplied by the ratio  $[\text{}^3\text{C}^*]_{\text{ALW}} / [\text{}^3\text{C}^*]_{\text{exp}}$ .

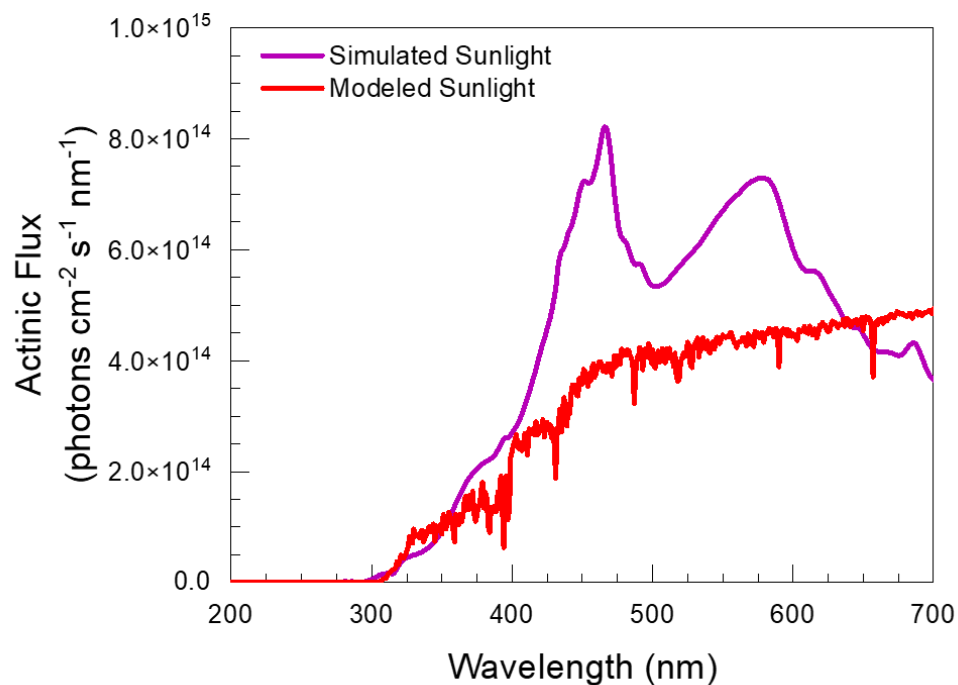

**Figure S1.** Experimental and simulated actinic flux. The red line is the modeled, midday Davis winter-solstice actinic flux from the Tropospheric Ultraviolet and Visible Radiation Model Version 5.3 ([https://www.acom.ucar.edu/Models/TUV/Interactive\\_TUV/](https://www.acom.ucar.edu/Models/TUV/Interactive_TUV/)). The purple line is the measured photon flux from our solar simulator on a day with  $j_{2\text{NB}} = 0.0051 \text{ s}^{-1}$ . The solar simulator contains a 1000 W Xe lamp equipped with a downstream water filter, an AM1.0 air mass filter (AM1D-3L, Sciencetech), and a 295 nm long-pass filter (20CGA-295, Thorlabs).

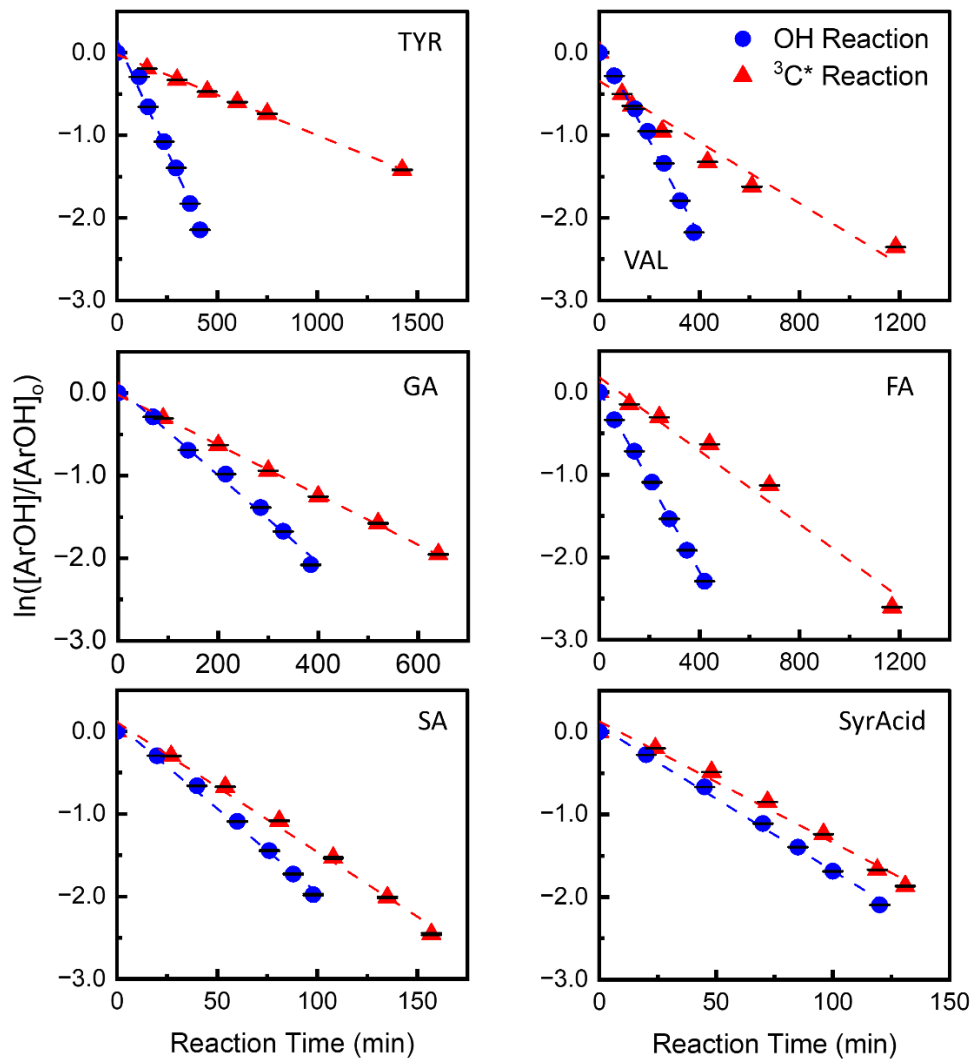

**Figure S2.** ArOH oxidation kinetics with  $\bullet OH$  (blue circles) and  $^3C^*$  (red triangles). Error bars represent one standard deviation, determined from the variability in the corresponding dark control.

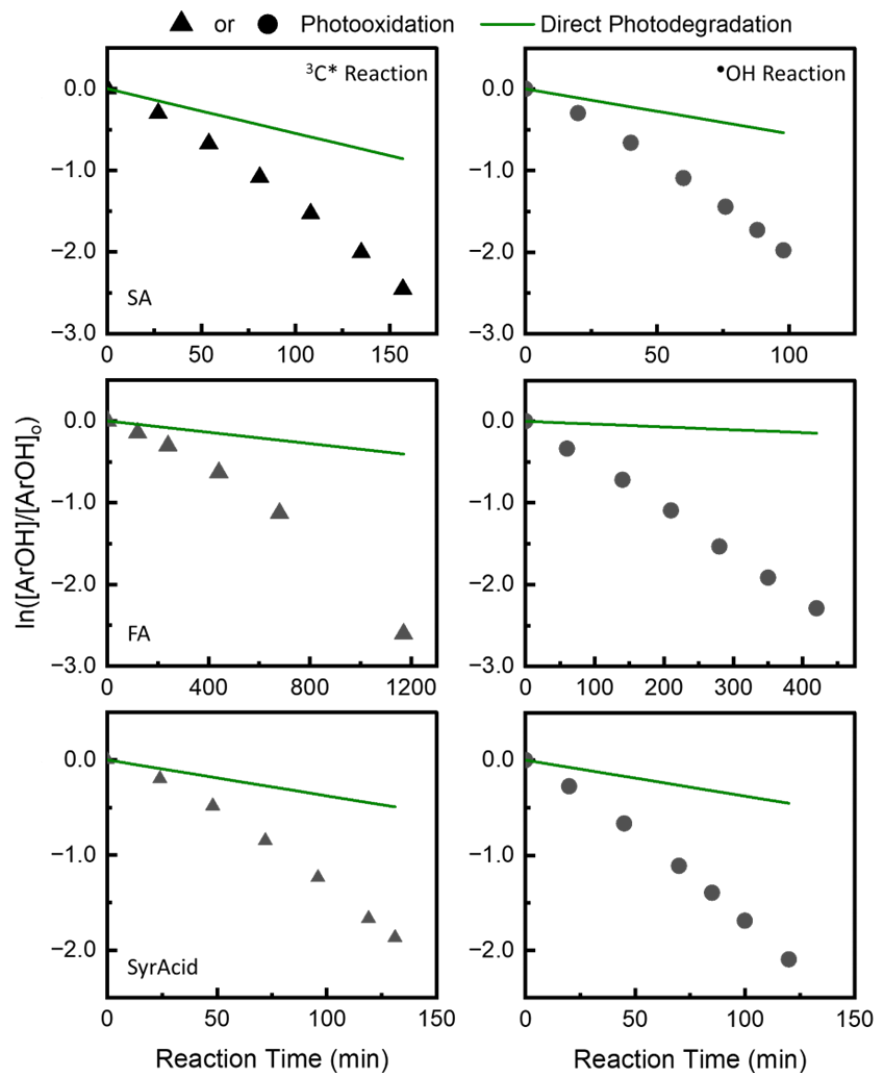

**Figure S3.** Comparison of direct photodegradation of SA, FA, and SyrAcid (green solid lines), calculated based on rate constants measured in Ma et al. (2021) and normalized to the  $j_{2NB}$  of each experiment (Tables S3 and S4) using  $j_{ArOH,exp} = \left[ \left( \frac{j_{ArOH}}{j_{2NB,WIN}} \right) \times j_{2NB,exp} \right]$ , compared to the total photodegradation measured in each experiment (points). Direct photodegradation contributed to 27-35%, 6-15%, and 22-27% to the loss of SA, FA, and SyrAcid, respectively. There was no significant photodegradation for the other three phenols studied.

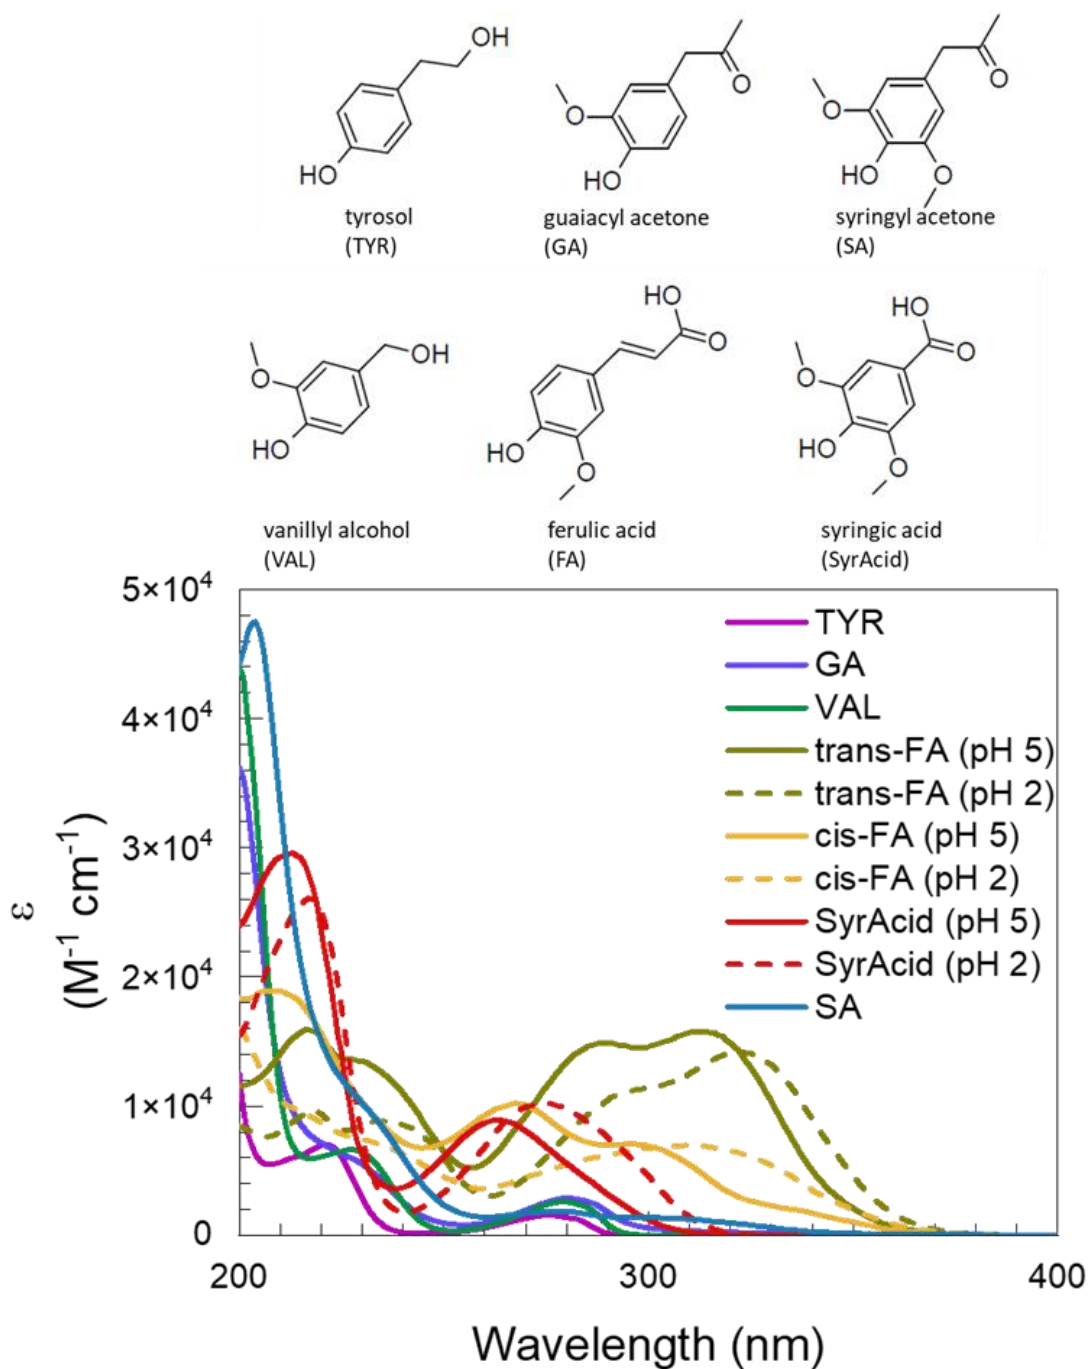

**Figure S4.** Top: Chemical structures of the six highly substituted ArOH in this study. Bottom: Base-10 molar absorption coefficients ( $\epsilon$ ) for aqueous, highly substituted ArOH. Values, which are tabulated in Table S2, were determined from the spectra of five different solutions of each ArOH at concentrations of 25, 100, 500, 1000, and 2000  $\mu M$  in a 1 cm cell.

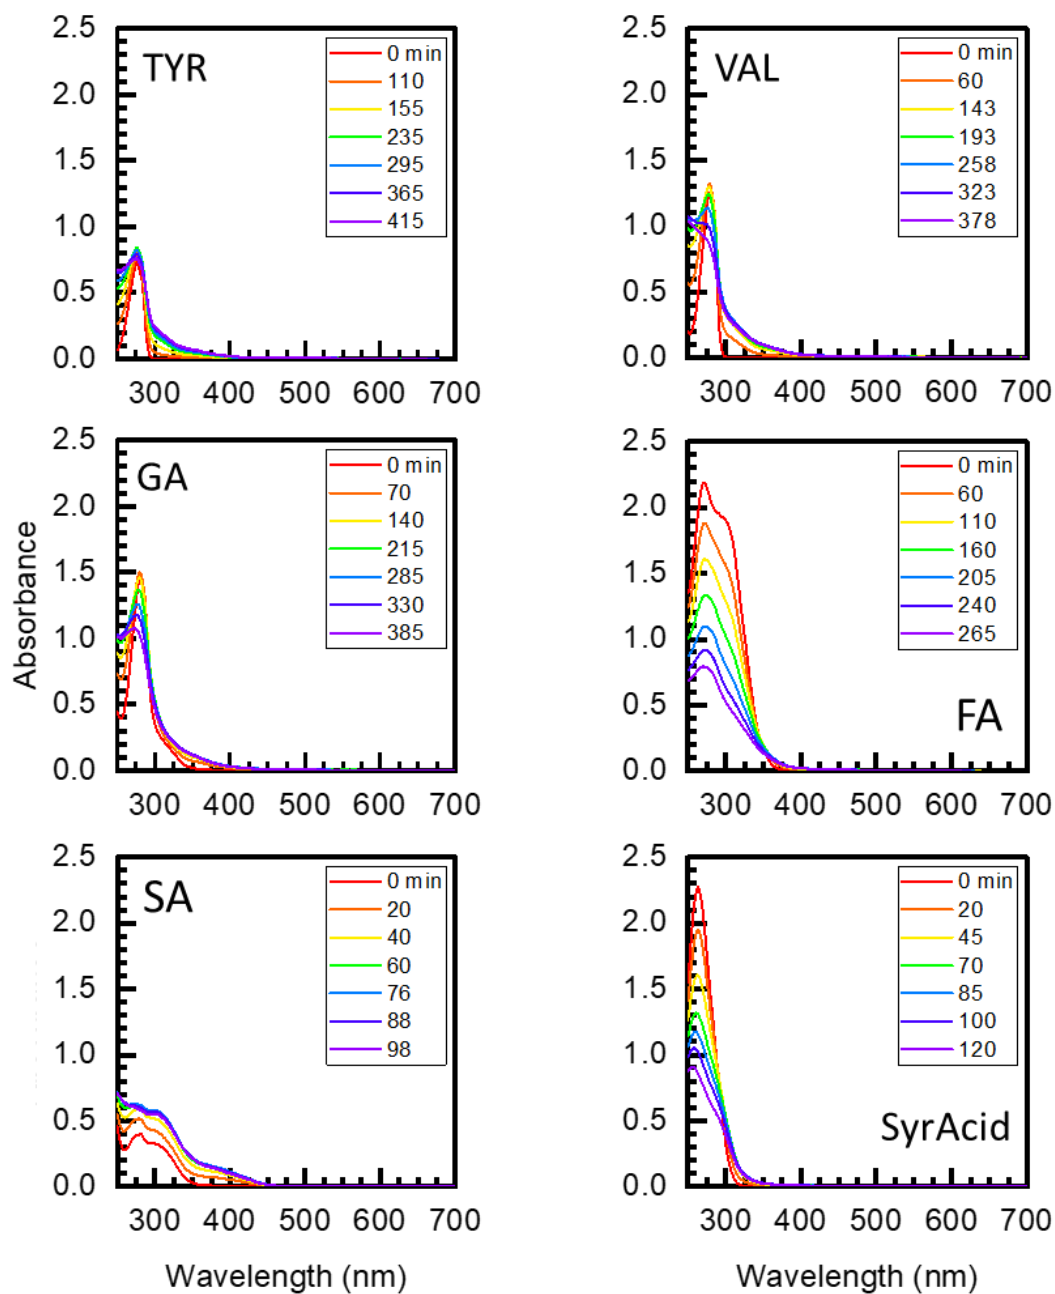

**Figure S5.** Absorbance measurements for mixtures during the  $\bullet\text{OH}$  reactions. The absorbance here, which was measured in a 5-cm cell at each time point, represents contributions from the oxidant precursor, starting phenol, and products.



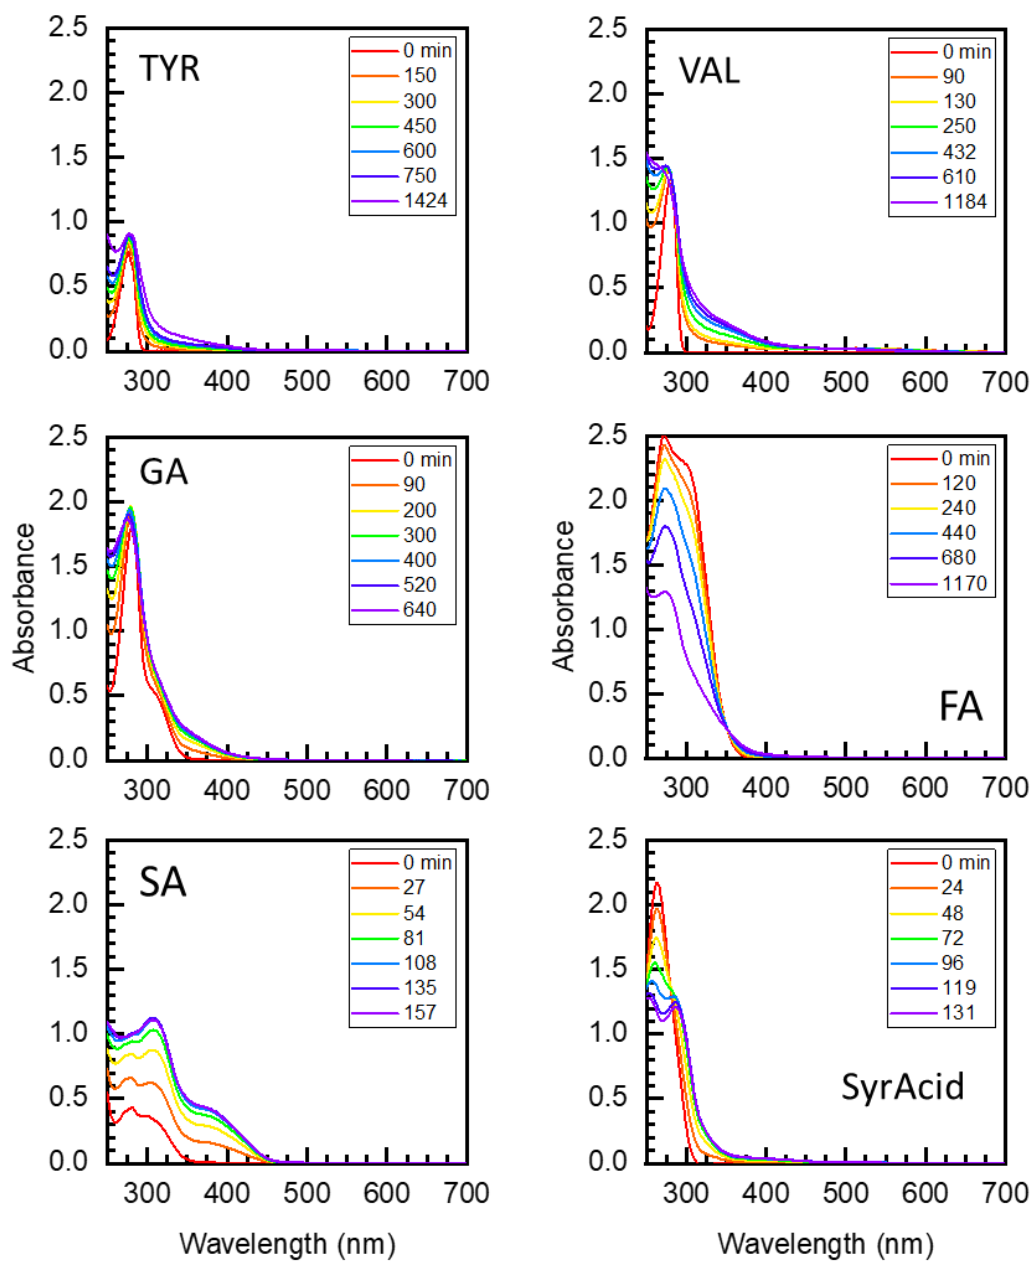

**Figure S6.** Absorbance measurements for mixtures during  $^3\text{C}^*$  reactions. The absorbance here, which was measured in a 5-cm cell at each time point, is due to the oxidant precursor, starting phenol, and products.

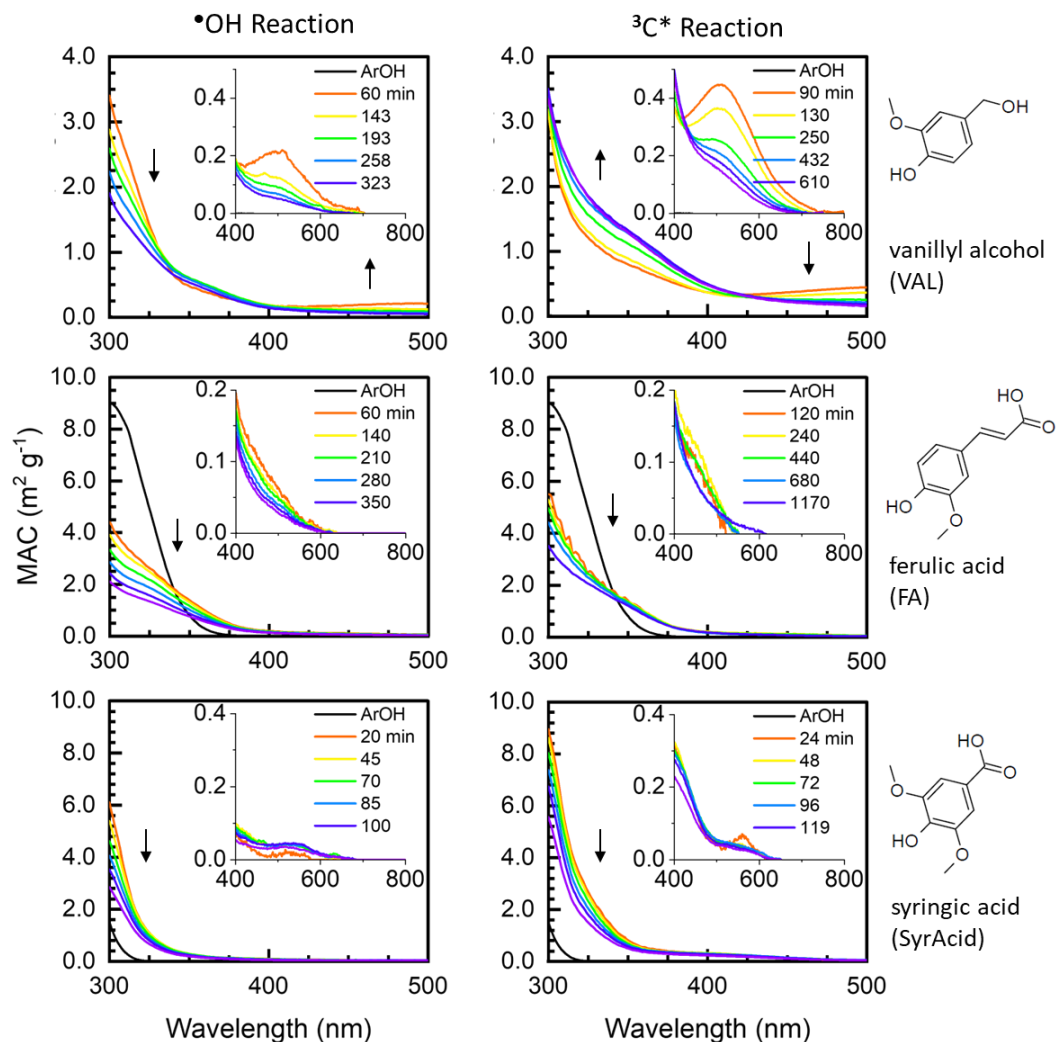

**Figure S7.** Evolution of mass absorption coefficients (MAC) of aqSOA formed from the  $\bullet\text{OH}$  reaction (left column) and  $^3\text{C}^*$  reaction (right column) of three phenols: vanillyl alcohol (top pair of panels), ferulic acid (middle pair), and syringic acid (bottom pair). Arrows show the trend in MAC (i.e., increasing or decreasing) in a given wavelength region as a function of illumination time. The MAC value for each starting phenol is shown as a black line. The absorbance contributions of the starting phenol and oxidant precursor (i.e.,  $\text{H}_2\text{O}_2$  or DMB) have been removed from the aqSOA MAC values (colored lines).

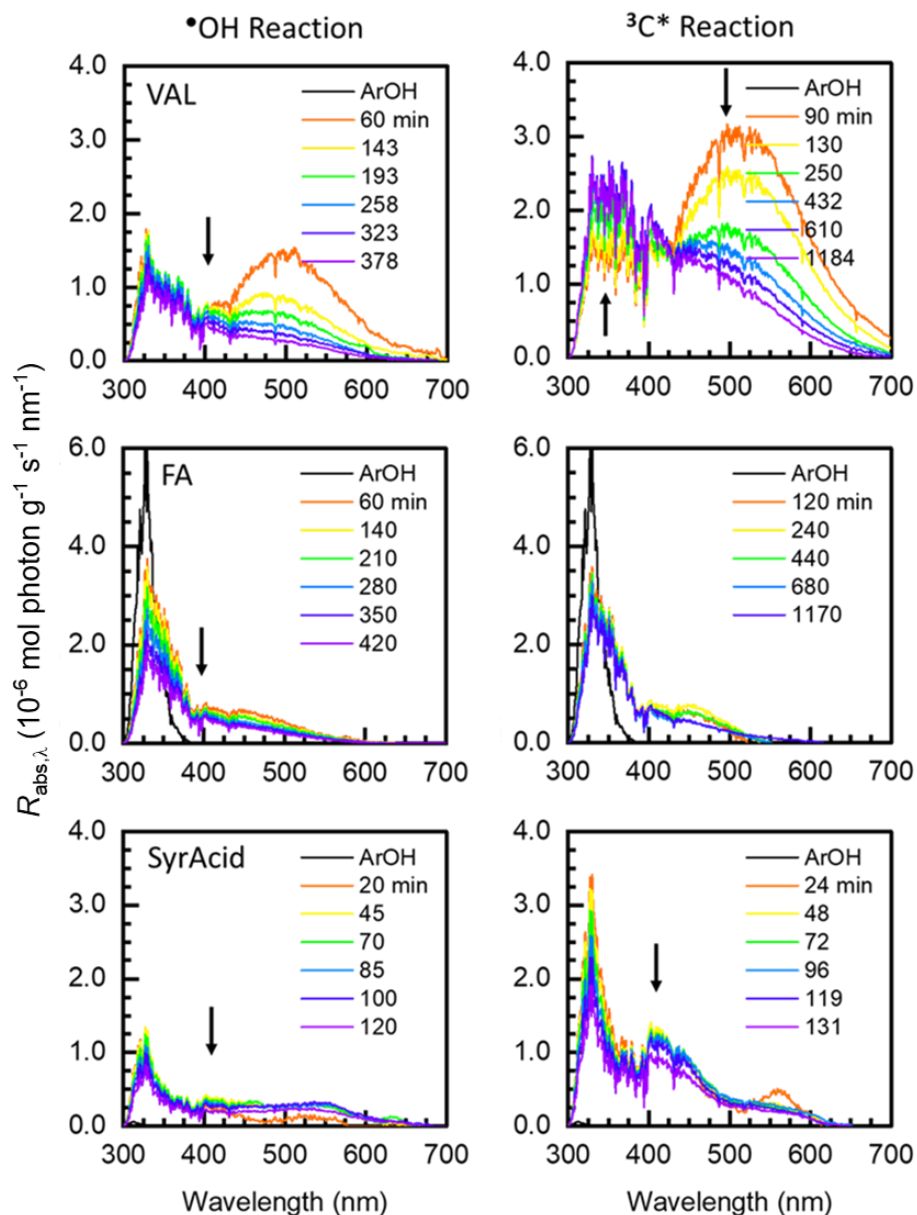

**Figure S8.** Rates of sunlight absorption for aqSOA formed from vanillyl alcohol (VAL; top), ferulic acid (FA; middle), and syringic acid (SyrAcid; bottom). The left column shows results for reactions of each phenol with  $\bullet\text{OH}$  while the right column shows the parallel results for  $^3\text{C}^*$  (right column) over the course of illumination. For a given phenol, the black line represents sunlight absorption by the parent ArOH and the colored lines are sunlight absorption for aqSOA at different illumination times. Arrows represent the time trends of aqSOA MAC values after the initial illumination time point.

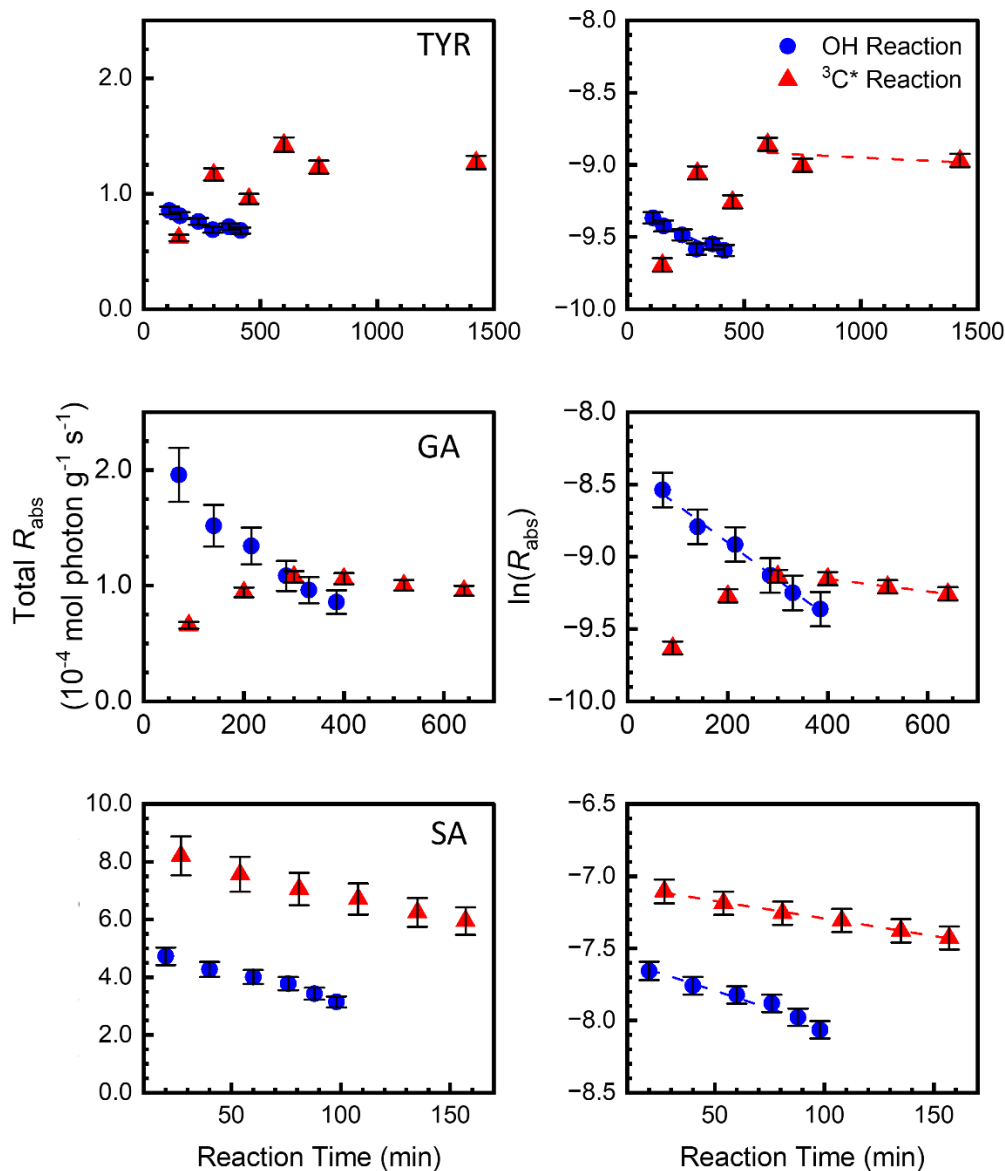

**Figure S9.** Decay in the rate of sunlight absorption ( $R_{\text{abs}}$ ,  $10^{-4}$  mol photon  $\text{g}^{-1}$   $\text{s}^{-1}$ ) for aqSOA formed from tyrosol (TYR), guaiacylacetone (GA), and syringyl acetone (SA) during continued reaction. The left column shows the total rate of aqSOA light absorption (from 280 to 800 nm) over the course of each illumination. The right column shows the same data, but with the natural log of the total rate of light absorption; these plots were used to determine the pseudo-first-order decay of light absorption by aqSOA during illumination. Dashed lines indicate the time points used to determine  $k'_{\text{Rabs}}$  values (Equation 1) for the reactions with triplets (red triangles and lines) and  $\cdot\text{OH}$  (blue circles and lines). Error bars represent one standard deviation, determined by propagating the standard deviation in HPLC measurements of ArOH decay with the uncertainty of the aqSOA mass yield measurements.

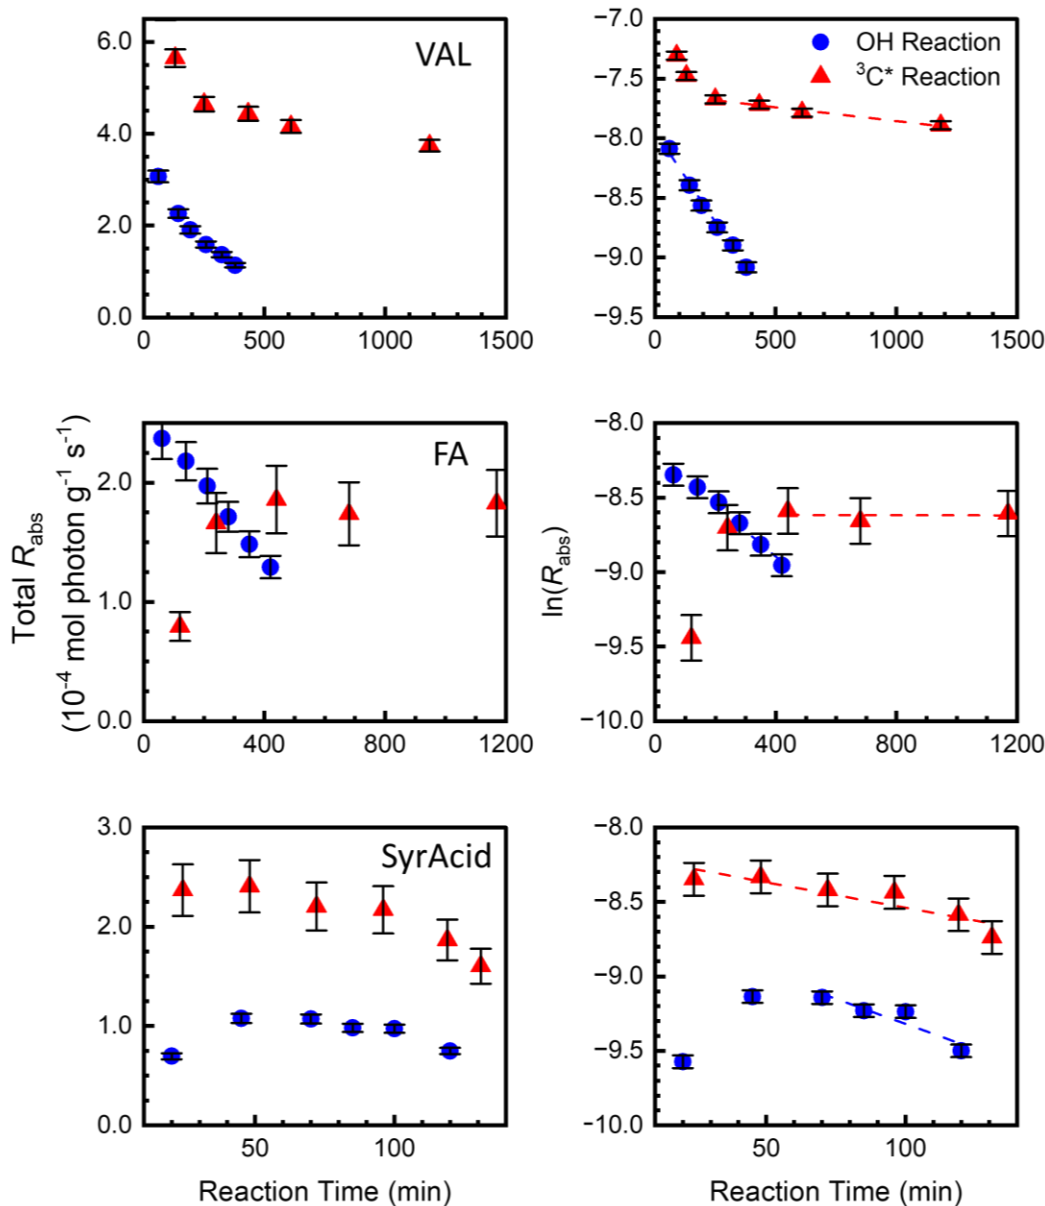

**Figure S10.** Decay in the rate of sunlight absorption ( $R_{\text{abs}}$ ,  $10^{-4}$  mol photon  $\text{g}^{-1}$   $\text{s}^{-1}$ ) for aqSOA formed from vanillyl alcohol (VAL), ferulic acid (FA), and syringic acid (SyrAcid). The left column shows the total rate of aqSOA light absorption (summed from 280 to 800 nm) at each sampled time point. The right column shows the same data, but with the natural log of the total rate of light absorption; these plots were used to determine the pseudo-first-order decay of light absorption by aqSOA during illumination. Dashed lines indicate the time points used to determine  $k'_{\text{Rabs}}$  values (Equation 1) for the reactions with triplets (red) and  $\bullet\text{OH}$  (blue). Error bars represent one standard deviation, determined by propagating the standard deviation in HPLC measurements of ArOH decay with the uncertainty of the aqSOA mass yield measurements.

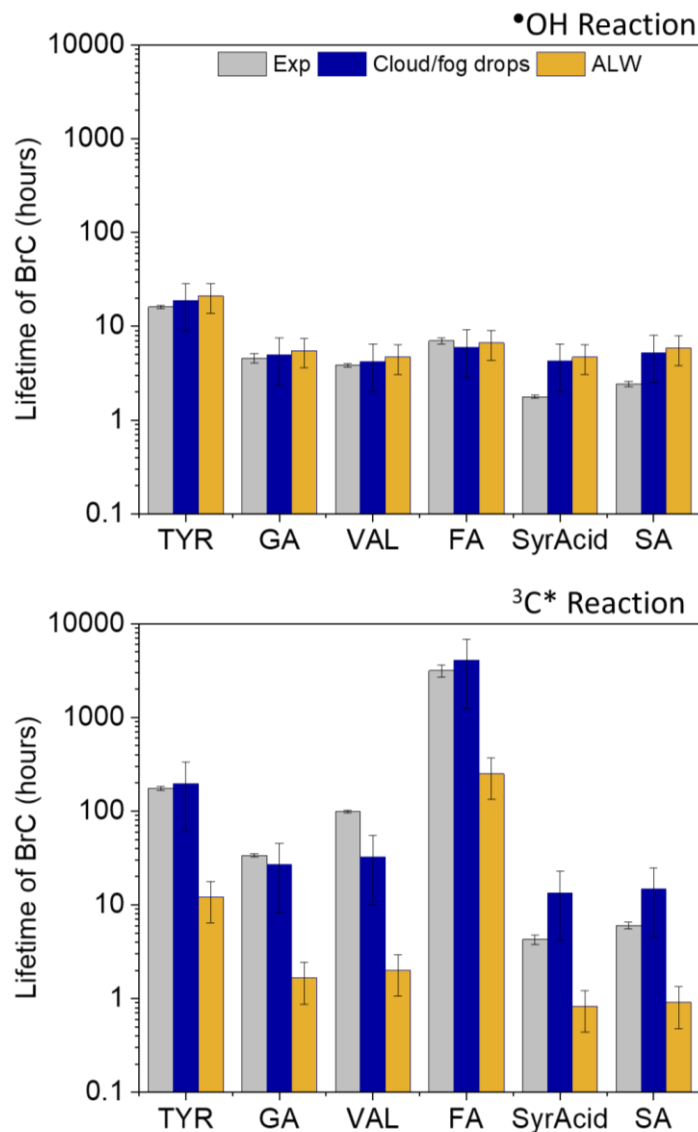

**Figure S11.** Lifetimes of phenolic BrC formed from  $\bullet\text{OH}$  and  $^3\text{C}^*$  reactions. Top panel: Lifetimes of  $\bullet\text{OH}$ -formed BrC with respect to  $\bullet\text{OH}$  oxidation under conditions of: (a) our experiments (gray bars), (b) cloud/fog drops (blue bars), and (c) ALW (gold bars). Bottom panel: Lifetime of light absorption by triplet-formed BrC with respect to oxidation by triplets. Error bars for experimental conditions represent one standard deviation determined from the relative standard deviation in the rate of aqSOA light absorption. Errors for ALW and cloud/fog drop conditions were calculated using the RSD of the rate of aqSOA light absorption propagated with the relative standard deviation of the photooxidant concentration measurements and predictions in Ma et al. (2024).

## Section S1. Potential Contributions of •OH and <sup>1</sup>O<sub>2</sub>\* in <sup>3</sup>C\* Experiments

In this section we assess the potential contributions of two secondary oxidants - •OH and singlet molecular oxygen (<sup>1</sup>O<sub>2</sub>\*) - towards phenol loss in our triplet experiments. Hydroxyl radical will be formed because reactions of triplet excited states with phenols form hydrogen peroxide (H<sub>2</sub>O<sub>2</sub>) (Anastasio et al., 1997), which undergoes direct photolysis to make •OH. In addition, the reaction of a triplet excited state with dissolved oxygen forms <sup>1</sup>O<sub>2</sub>\* (Zepp et al., 1977). Both •OH and <sup>1</sup>O<sub>2</sub>\* can react with aqueous phenols.

To understand the potential significance of ArOH loss by •OH, we first calculate the photolysis rate of H<sub>2</sub>O<sub>2</sub> ( $j_{\text{H}_2\text{O}_2}$ , s<sup>-1</sup>) under our experimental conditions based on results from the •OH experiments:

$$j_{\text{H}_2\text{O}_2} = \frac{[\text{OH}] \times k'_{\text{sink,OH}}}{[\text{H}_2\text{O}_2]}, \quad (\text{S1})$$

where [•OH] is the steady-state concentration (Table S3),  $k'_{\text{sink,OH}}$  is the calculated pseudo-first-order rate constant for the loss of •OH in the •OH experiments (i.e., due to reactions with 2-propanol and ArOH), and [H<sub>2</sub>O<sub>2</sub>] is the initial molar concentration of hydrogen peroxide in the •OH experiment. Values of  $j_{\text{H}_2\text{O}_2}$  range from  $2.4 \times 10^{-6}$  to  $6.7 \times 10^{-6}$  s<sup>-1</sup> in our •OH experiments.

Next, we estimate the concentration of [•OH] in the <sup>3</sup>C\* experiments by:

$$[\text{OH}] = \frac{j_{\text{H}_2\text{O}_2} \times [\text{H}_2\text{O}_2]}{k'_{\text{sink,3C*}}}, \quad (\text{S2})$$

where [H<sub>2</sub>O<sub>2</sub>] is the estimated concentration at the midway illumination time in the triplet experiment and  $k'_{\text{sink,3C*}}$  is the calculated pseudo-first-order rate constant for the loss of •OH in the <sup>3</sup>C\* experiments. Since we did not add 2-PrOH in the <sup>3</sup>C\* experiments, the •OH sink here is only from the phenol. We ignored the DMB sink for •OH because it is small compared to the phenol sink. To estimate the H<sub>2</sub>O<sub>2</sub> concentration in the <sup>3</sup>C\* experiments, we used the ratio of the quantum yield of H<sub>2</sub>O<sub>2</sub> formation to the quantum yield of ArOH loss (0.18) determined from <sup>3</sup>DMB\* with phenol (Anastasio et al., 1997):

$$\frac{\Delta n_{\text{H}_2\text{O}_2}}{\Delta n_{\text{ArOH}}} = 0.18. \quad (\text{S3})$$

That is, 0.18 moles of H<sub>2</sub>O<sub>2</sub> are formed for every mole of phenol reacted. We then multiply this ratio by the reduction in the molar concentration of ArOH by the midpoint of the experimental illumination time to estimate the concentration of H<sub>2</sub>O<sub>2</sub> formed by this point. At the halfway point in the triplet-mediated degradation of phenols, approximately 63% of the initial ArOH has reacted, which should result in 12 μM of H<sub>2</sub>O<sub>2</sub> for experiments with 100 μM initial ArOH and 6 μM H<sub>2</sub>O<sub>2</sub> for experiments that started with 50 μM ArOH.

The resulting estimated concentrations of [•OH] in the <sup>3</sup>C\* experiments are all low, on the order of 10<sup>-17</sup> M, which is several orders of magnitude lower than the experimental [<sup>3</sup>C\*] (Table S4). The result is that •OH accounts for no more than 1% of ArOH loss in our experiments, i.e., photoformed H<sub>2</sub>O<sub>2</sub> does not contribute significantly to ArOH loss or aqSOA formation.

The other secondary photooxidant that might be important in our triplet experiments is singlet molecular oxygen, which is formed by the interaction of triplet states with dissolved oxygen. As described by McNeill and Canonica (2016), the concentration of  $^1\text{O}_2^*$  in natural waters is approximately equal to the concentration of triplet excited states. Thus, the importance of singlet oxygen as an oxidant for ArOH in our experiments can be estimated by comparing the rate constants of  $^1\text{O}_2^*$  and  $^3\text{C}^*$  with phenols. While rate constants for  $^3\text{DMB}^*$  with phenols at pH 5 are  $(0.1 - 6) \times 10^9 \text{ M}^{-1} \text{ s}^{-1}$  (Ma et al., 2021; Smith et al., 2014), values for singlet molecular oxygen with neutral (i.e., not deprotonated) phenols in water are typically  $(0.1 - 4) \times 10^7 \text{ M}^{-1} \text{ s}^{-1}$  (Wilkinson et al., 1995). Thus, we expect that singlet oxygen is typically responsible for a negligible amount ( $\sim 1\%$ ) of the phenol loss in our triplet experiments.



## Section S2. Absorbance Correction and $MAC_{ArOH}$ Determination

The experimentally measured absorbance of a reaction mixture at a given wavelength ( $Abs_{exp,\lambda}$ , e.g., Figures S4 and S5) includes contributions from the starting phenol ( $Abs_{ArOH,\lambda}$ ),  $H_2O_2$  or DMB as the oxidant precursor ( $Abs_{Ox,\lambda}$ ), and the aqSOA that formed ( $Abs_{aqSOA,\lambda}$ ):

$$Abs_{exp,\lambda} = Abs_{ArOH,\lambda} + Abs_{Ox,\lambda} + Abs_{aqSOA,\lambda}. \quad (S4)$$

To calculate the MAC for the parent ArOH ( $MAC_{ArOH}$ ) in this mixture, we took the absorbance at time 0 (i.e., where  $Abs_{aqSOA,\lambda} = 0$ ) and subtracted the absorbance contribution from the known concentration of either  $H_2O_2$  (in  $\bullet OH$  reactions) or DMB (in  $^3C^*$  reactions):

$$Abs_{ArOH,\lambda} = Abs_{exp,\lambda} \text{ at time zero} - Abs_{Ox,\lambda}, \quad (S5)$$

$$\text{where } Abs_{Ox,\lambda} = \epsilon_{Ox,\lambda} \times [Ox] \times l. \quad (S6)$$

The absorbance of the oxidant precursor at wavelength  $\lambda$  was determined as the product of the base-10 molar absorption coefficient of the precursor ( $\epsilon_{Ox,\lambda}$ ,  $M^{-1} \text{ cm}^{-1}$ ), the oxidant precursor concentration ( $[Ox]$ , M), and the cell path length ( $l$ , cm). Values of the oxidant precursor molar absorption coefficients are from Miller and Kester (1988) for  $H_2O_2$  and from Smith et al. (2014) for DMB.

The remaining absorbance at time 0 represents the absorbance of the starting phenol. Absorbance values for the starting phenol can also be calculated using the molar absorption coefficients from Table S2 and equation S7; this procedure results in the same values.

$$Abs_{ArOH,\lambda} = \epsilon_{ArOH,\lambda} \times [ArOH] \times l \quad (S7)$$

This parent phenol absorbance was then used to calculate the corresponding MAC:

$$MAC_{ArOH,\lambda} (\text{m}^2 \text{ g}^{-1}) = \frac{2.303 \times Abs_{ArOH,\lambda} \times 10^3 \times 10^{-4}}{l \times [ArOH]} \quad (S8)$$

where 2.303 converts the absorbance from base-10 to base-e,  $l$  is the path length of our cuvette (5 cm),  $[ArOH]$  is starting phenol mass concentration ( $\text{g L}^{-1}$ ), the factor of  $10^3$  converts from L to  $\text{cm}^3$ , and the factor of  $10^{-4}$  converts from  $\text{cm}^2$  to  $\text{m}^2$ .

For subsequent time points, we calculated the wavelength-specific absorbance of aqSOA in the reaction mixture by removing the absorbance contributions from both the remaining parent phenol and oxidant precursor:

$$Abs_{aqSOA,\lambda} = Abs_{exp,\lambda} - (Abs_{ArOH,\lambda} + Abs_{Ox,\lambda}) \quad (S9)$$

The absorbance of the phenol at a given reaction time and wavelength was determined as the product of its concentration (determined by HPLC), the molar absorption coefficient at that wavelength (Table S2), and the cell path length, as shown in equation S7. The absorbance of the oxidant precursor was determined as explained in equation S6. For triplet experiments, the DMB concentration determined in the same HPLC run as the ArOH measurement.

Because we did not measure the  $\text{H}_2\text{O}_2$  concentration, we estimated  $[\text{H}_2\text{O}_2]$  over the course of illumination by considering the stoichiometries of ArOH and  $\text{H}_2\text{O}_2$  loss during illumination. The main loss of  $\text{H}_2\text{O}_2$  is through direct photolysis to form  $\bullet\text{OH}$  (SR1), while reaction with  $\bullet\text{OH}$  (SR3) is a minor path. Based on the rate constants for SR2 and SR3 (Arciva et al., 2022; Christensen et al., 1982), we calculated the percent of  $\bullet\text{OH}$  reacting with ArOH or  $\text{H}_2\text{O}_2$  in each reaction mixture; e.g., for GA, these are 92% and 8%, respectively. Next, we determined the relationships between the change in the number of moles of  $\text{H}_2\text{O}_2$  ( $\Delta n_{\text{H}_2\text{O}_2}$ ),  $\bullet\text{OH}$  formed ( $\Delta n_{\bullet\text{OH}}$ ) and GA ( $\Delta n_{\text{GA}}$ ) in these reactions.

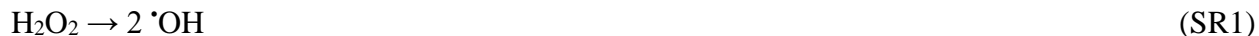

For this reaction,  $\Delta n_{\text{H}_2\text{O}_2} = 0.5 \Delta n_{\bullet\text{OH}}$

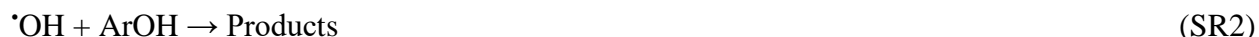

Based on the relative rates of SR2 and SR3 as fates of  $\bullet\text{OH}$ ,  $\Delta n_{\bullet\text{OH}} = \Delta n_{\text{GA}} / 0.92$ .

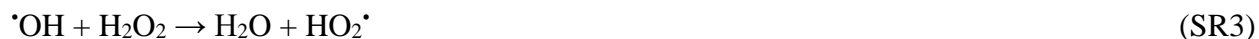

Since 2  $\text{HO}_2\bullet$  combine to form 1 molecule of  $\text{H}_2\text{O}_2$ , we can rewrite SR3 as

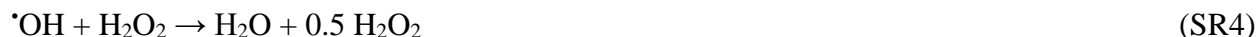

Considering the relative importance of SR2 and SR3 as sinks of  $\bullet\text{OH}$ , we can write the relationship

$$\Delta n_{\bullet\text{OH}} = (\Delta n_{\text{H}_2\text{O}_2} / 0.08) \times 2 = \Delta n_{\text{H}_2\text{O}_2} / 0.04 \text{ for SR3.}$$

We can then sum the stoichiometric losses of  $\text{H}_2\text{O}_2$  and  $\bullet\text{OH}$  from these reactions to reveal the relationship between the number of moles of  $\text{H}_2\text{O}_2$  and GA lost:

$$\text{Total } \Delta n_{\text{H}_2\text{O}_2} = 0.5 \Delta n_{\bullet\text{OH}} + 0.04 \Delta n_{\bullet\text{OH}} = 0.54 \Delta n_{\bullet\text{OH}} = 0.54 \times (\Delta n_{\text{GA}} / 0.92) = 0.59 \Delta n_{\text{GA}}.$$

$$\text{That is, } \frac{\Delta n_{\text{H}_2\text{O}_2}}{\Delta n_{\text{GA}}} = 0.59, \quad (\text{S10})$$

which indicates that the number of moles of  $\text{H}_2\text{O}_2$  lost during reaction is 59% of the number of moles of GA lost for our conditions. This example is specific for GA, but we performed parallel calculations for the other five phenols. The percentage for reactions of TYR, GA, and VAL average ( $\pm 1\sigma$ ) to 59% ( $\pm 1.0\%$ ), and for FA, SyrAcid, and SA, 76% ( $\pm 4.0\%$ ). These percentages are different across the two sets of ArOH due to the different starting concentrations of precursor ArOH and  $\text{H}_2\text{O}_2$  (Table S1).

The ratio of the change in the number of moles in the reaction solution is equivalent to the ratio expressed as concentrations. Thus, we can determine  $\Delta[\text{H}_2\text{O}_2]_t$ , how much the concentration of  $\text{H}_2\text{O}_2$  changed between adjacent reaction sampling times, by:

$$\Delta[\text{H}_2\text{O}_2]_t = \Delta[\text{ArOH}]_t \times \frac{\Delta n_{\text{H}_2\text{O}_2}}{\Delta n_{\text{ArOH}}}, \quad (\text{S11})$$

where  $\frac{\Delta n_{H_2O_2}}{\Delta n_{ArOH}}$  is 0.59 for GA,  $\Delta[ArOH]_t$  is the change in ArOH concentration between two time points as determined by HPLC, and  $\Delta[H_2O_2]_t$  is the change in  $H_2O_2$  concentration in M. For use in equation S6 for the  $\bullet OH$  experiments, we determined the concentration of  $H_2O_2$  in the reaction solution at a given time using:

$$[H_2O_2]_t = [H_2O_2]_o - \Delta[H_2O_2]_t \quad (S12)$$

After all of this work, our calculations indicate that the change in  $H_2O_2$  concentration over the course of illumination was small ( $< 5\%$ ) in our  $\bullet OH$  experiments, but we still accounted for it.

## References

- Anastasio, C. and McGregor, K. G.: Chemistry of fog waters in California's Central Valley: 1. In situ photoformation of hydroxyl radical and singlet molecular oxygen, *Atmos. Environ.*, 35(6), 1079–1089, [https://doi.org/10.1016/S1352-2310\(00\)00281-8](https://doi.org/10.1016/S1352-2310(00)00281-8), 2001.
- Anastasio, C., Faust, B. C. and Rao, C. J.: Aromatic Carbonyl Compounds as Aqueous-Phase Photochemical Sources of Hydrogen Peroxide in Acidic Sulfate Aerosols, Fogs, and Clouds. 1. Non-Phenolic Methoxybenzaldehydes and Methoxyacetophenones with Reductants (Phenols), *Environ. Sci. Technol.*, 31(1), 218–232, <https://doi.org/10.1021/es960359g>, 1997.
- Arciva, S., Niedek, C., Mavis, C., Yoon, M., Sanchez, M. E., Zhang, Q. and Anastasio, C.: Aqueous ·OH oxidation of highly substituted phenols as a source of secondary organic aerosol., *Environ. Sci. Technol.*, 56(14), 9959–9967, <https://doi.org/10.1021/acs.est.2c02225>, 2022.
- Christensen, H., Sehested, K. and Corfitzen, H.: Reactions of hydroxyl radicals with hydrogen peroxide at ambient and elevated temperatures, *J. Phys. Chem.*, 86(9), 1588–1590, <https://doi.org/10.1021/j100206a023>, 1982.
- Erdemgil, F. Z., Sanli, S., Sanli, N., Ozkan, G., Barbosa, J., Guiteras, J. and Beltrán, J. L.: Determination of pK(a) values of some hydroxylated benzoic acids in methanol-water binary mixtures by LC methodology and potentiometry., *Talanta*, 72(2), 489–496, <https://doi.org/10.1016/j.talanta.2006.11.007>, 2007.
- Ma, L., Guzman, C., Niedek, C., Tran, T., Zhang, Q. and Anastasio, C.: Kinetics and mass yields of aqueous secondary organic aerosol from highly substituted phenols reacting with a triplet excited state, *Environ. Sci. Technol.*, 55(9), 5772–5781, <https://doi.org/10.1021/acs.est.1c00575>, 2021.
- Ma, L., Worland, R., Heinlein, L., Guzman, C., Jiang, W., Niedek, C., Bein, K. J., Zhang, Q. and Anastasio, C.: Seasonal variations in photooxidant formation and light absorption in aqueous extracts of ambient particles, *Atmospheric Chemistry and Physics*, 24(1), 1–21, <https://doi.org/10.5194/acp-24-1-2024>, 2024.
- McNeill, K. and Canonica, S.: Triplet state dissolved organic matter in aquatic photochemistry: reaction mechanisms, substrate scope, and photophysical properties., *Environ. Sci. Process. Impacts*, 18(11), 1381–1399, <https://doi.org/10.1039/c6em00408c>, 2016.
- Miller, W. L. and Kester, D. R.: Hydrogen peroxide measurement in seawater by (p-hydroxyphenyl)acetic acid dimerization, *Anal. Chem.*, 60(24), 2711–2715, <https://doi.org/10.1021/ac00175a014>, 1988.
- Smith, J. D., Sio, V., Yu, L., Zhang, Q. and Anastasio, C.: Secondary organic aerosol production from aqueous reactions of atmospheric phenols with an organic triplet excited state., *Environ. Sci. Technol.*, 48(2), 1049–1057, <https://doi.org/10.1021/es4045715>, 2014.

Wilkinson, F., Helman, W. P. and Ross, A. B.: Rate constants for the decay and reactions of the lowest electronically excited singlet state of molecular oxygen in solution. an expanded and revised compilation, *J. Phys. Chem. Ref. Data*, 24(2), 663–677, <https://doi.org/10.1063/1.555965>, 1995.

Zepp, R. G., Wolfe, N. L., Baughman, G. L. and Hollis, R. C.: Singlet oxygen in natural waters, *Nature*, 267(5610), 421–423, <https://doi.org/10.1038/267421a0>, 1977.
